# Supplementary material for: Dynamic Survival Risk Prognostic Model and Genomic Landscape for Atypical Teratoid/Rhabdoid Tumors: A Population-Based, Real-World Study
Source: MDPI journal article supplement (doi:10.3390/cancers16051059), 2024-03-05
Supplement: s1 [file s1]

## Supplementary Material

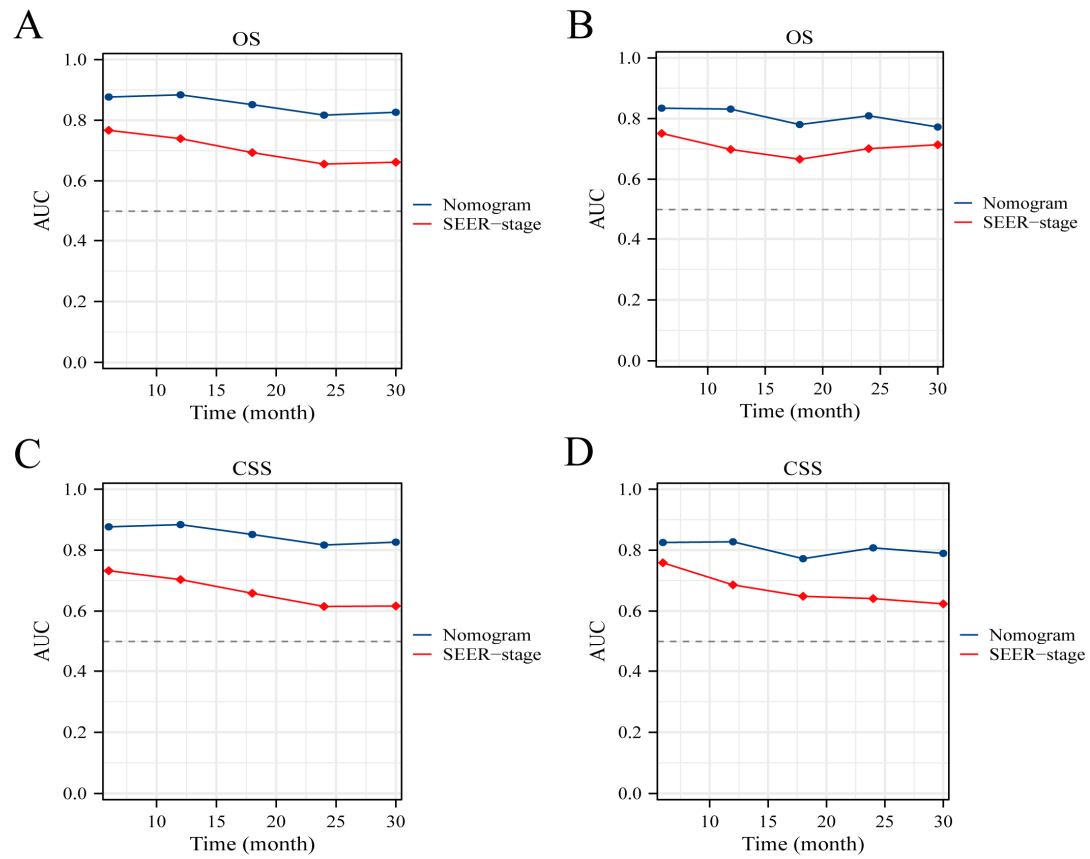

Supplementary Figure S1. Time-dependent ROC curves comparing the use of the Nomogram and SEER-stage system to predict the 1-, 2- and 3-year OS and CSS in the training cohort (A,C), the internal validation cohort (B,D).

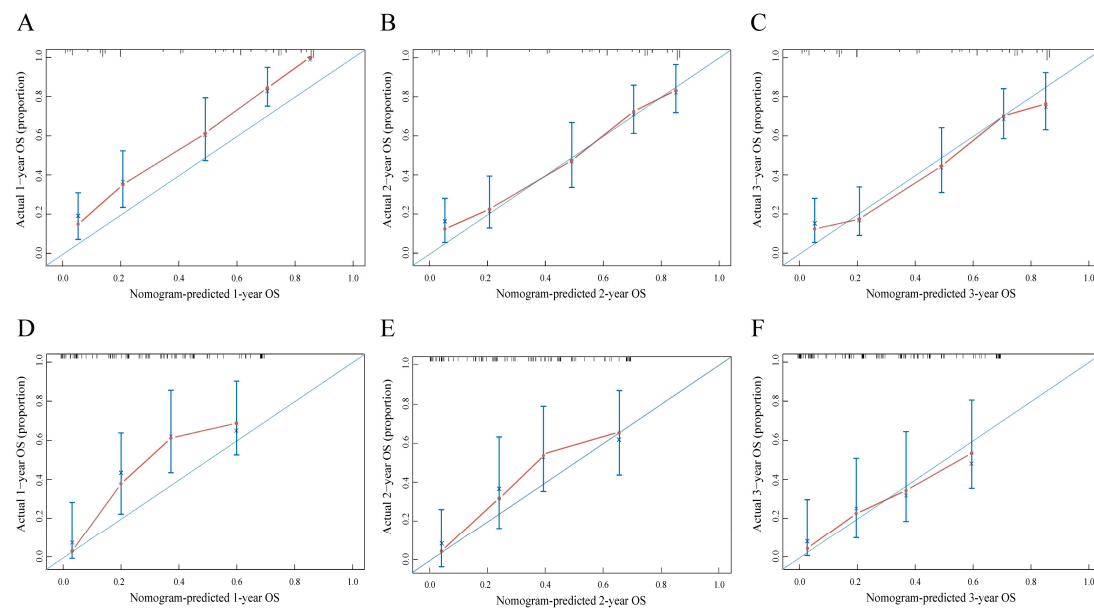

Supplementary Figure S2. The calibration curves predicting 1-year (A,D), 2-year (B,E), and 3-year (C,F) OS in training group and validation group.

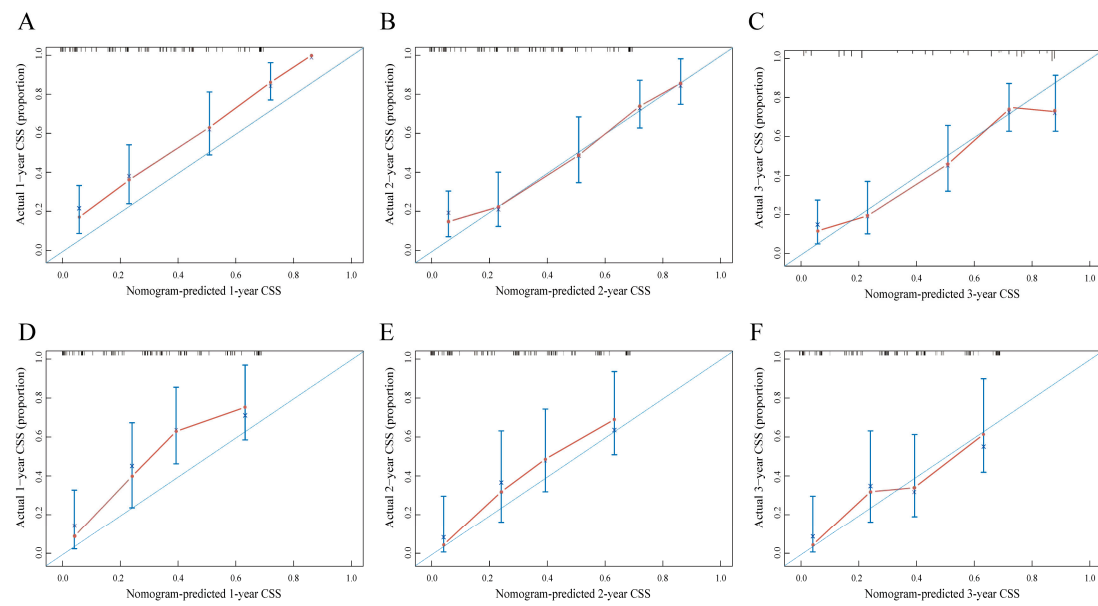

Supplementary Figure S3. The calibration curves predicting 1-year (A,D), 2-year (B,E), and 3-year (C,F) CSS in training group and validation group.

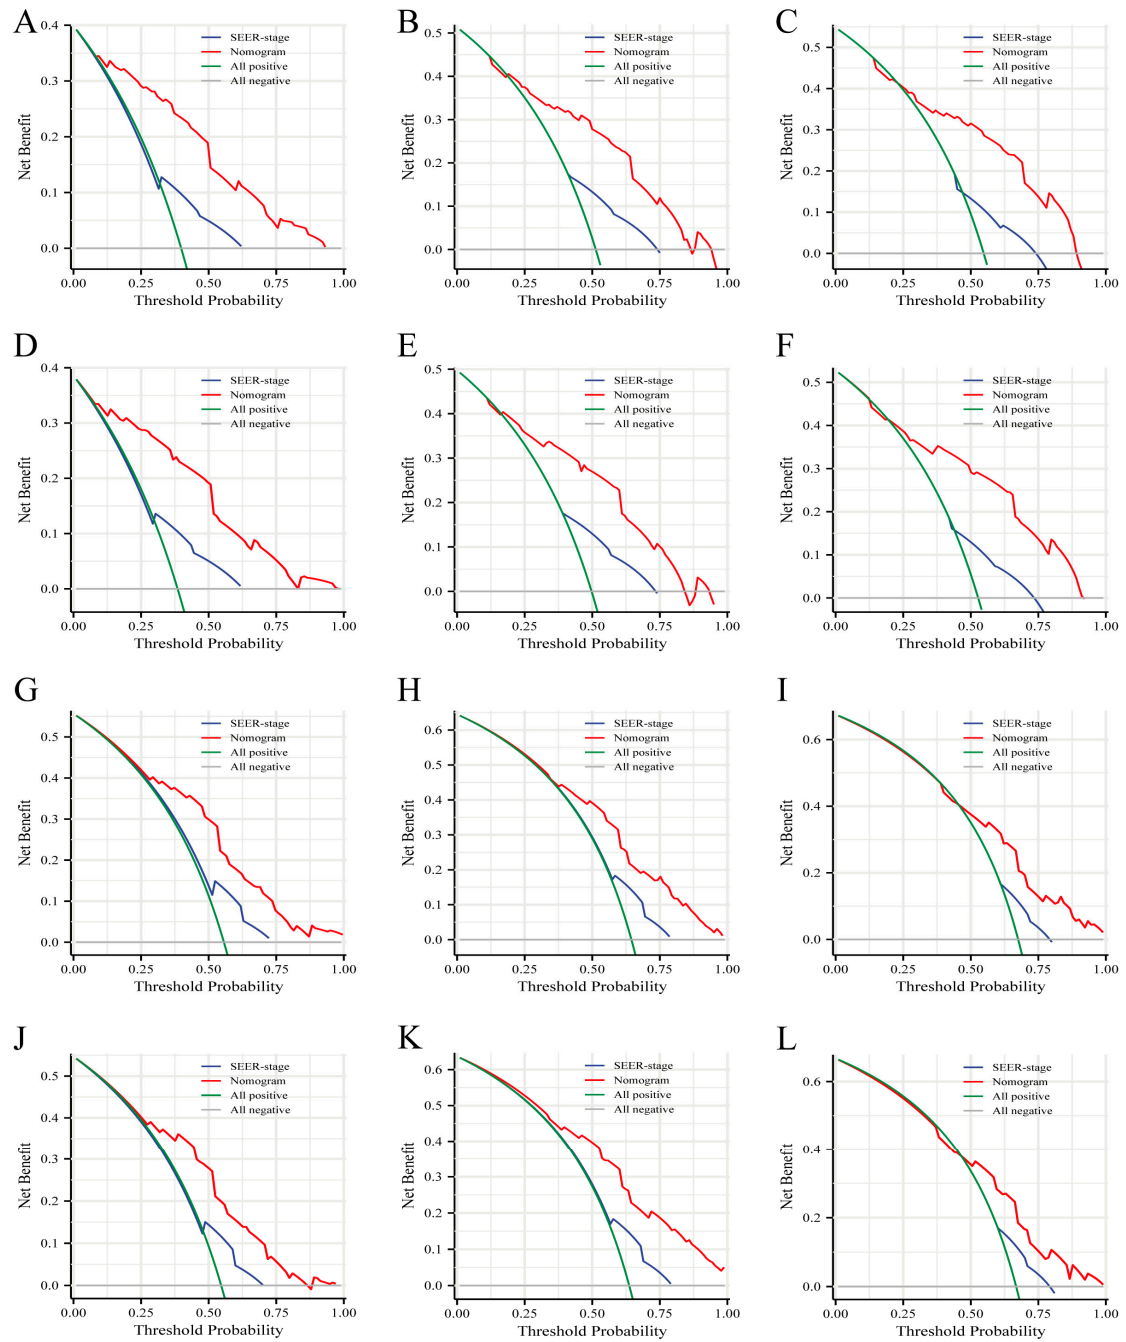

Supplementary Figure S4. The nomogram and the SEER-stage of the Decision curve analysis in the prediction of OS at the 1-year (A,D), 2-year (B,E) and 3-year (C,F) point in the training and validation groups. The prediction of CSS at the 1-year (G,J), 2-year (H,K) and 3-year (I,L) point in the training and validation groups.

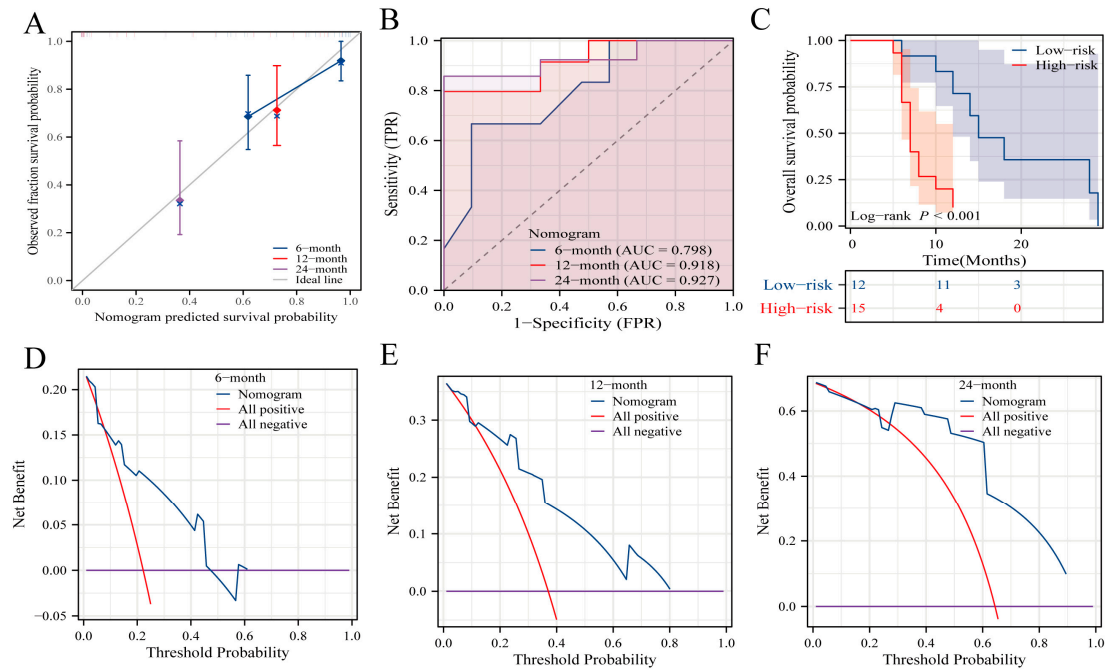

Supplementary Figure S5. The external validation of predictive models. (A) Calibration curves forecasting OS at 0.5-year, 1-year, and 2-year intervals. (B) Time-dependent ROC curve for OS. (C) Risk-stratification based on risk points derived from the model. (D-F) Decision curve analysis for OS prediction at 0.5-year (D), 1-year (E), and 2-year (F) milestones.

Supplementary Table S1. Characteristics of the AT/RT patients in the external validation group.

| Characteristics                                        | External validation group in |
|--------------------------------------------------------|------------------------------|
|                                                        | Chongqing (n=27)<br>no.(%)   |
| <b>Median follow-up time</b><br>(Months, Range)        | 22 (4.3-39.7)                |
| <b>Median overall survival time</b><br>(Months, 95%CI) | 10 (5.8-14.2)                |
| <b>Gender</b>                                          |                              |
| Male                                                   | 15 (55.6%)                   |
| Female                                                 | 12 (44.4%)                   |
| <b>Age</b>                                             |                              |
| <1 years                                               | 6 (22.2%)                    |
| 1-3 years                                              | 15 (55.6%)                   |
| >3 years                                               | 6 (22.2%)                    |
| <b>Race</b>                                            |                              |
| White                                                  | 0 (0.0%)                     |
| Black                                                  | 0 (0.0%)                     |
| Others                                                 | 27 (100.0%)                  |
| <b>Grade</b>                                           |                              |
| Poorly/Undifferentiated                                | 20 (74.1%)                   |
| Unknown                                                | 7 (25.9%)                    |
| <b>Primary Site</b>                                    |                              |
| Brain                                                  | 21 (77.8%)                   |
| Spinal cord                                            | 6 (22.2%)                    |
| <b>Tumor size</b>                                      |                              |
| <4cm/NOS                                               | 10 (37.0%)                   |
| ≥4cm                                                   | 17 (63.0%)                   |
| <b>M stage</b>                                         |                              |
| M0                                                     | 11 (40.7%)                   |
| M1                                                     | 16 (59.3%)                   |
| <b>Surgery</b>                                         |                              |
| GTR/STR                                                | 25 (92.6%)                   |
| Others                                                 | 2 (7.4%)                     |
| <b>Radiation</b>                                       |                              |
| No/Unknown                                             | 23 (85.2%)                   |
| Yes                                                    | 4 (14.8%)                    |
| <b>Chemotherapy</b>                                    |                              |
| No/Unknown                                             | 13 (48.1%)                   |
| Yes                                                    | 14 (51.9%)                   |

Supplementary Table S2. Propensity-matched score analysis of triple-therapy (SRC) with surgery plus radiotherapy/chemotherapy (SB/SC) in AT/RT.

| Characteristics           | Unmatched      |              | <i>P value</i> | Matched        |             | <i>P value</i> |
|---------------------------|----------------|--------------|----------------|----------------|-------------|----------------|
|                           | SR/SC<br>N=124 | SRC<br>N=133 |                | SR/SC<br>N=124 | SRC<br>N=77 |                |
| <b>Years of diagnosis</b> |                |              | <0.001         |                |             | 0.113          |
| 2000-2009                 | 58 (47%)       | 93 (70%)     |                | 66 (53%)       | 32 (42%)    |                |
| 2010-2019                 | 66 (53%)       | 40 (30%)     |                | 58 (47%)       | 45 (58%)    |                |
| <b>Age</b>                |                |              | <0.001         |                |             | 0.172          |
| <1 year                   | 56 (45%)       | 25 (19%)     |                | 56 (45%)       | 25 (32%)    |                |
| 1-3 year                  | 52 (42%)       | 65 (49%)     |                | 52 (42%)       | 42 (55%)    |                |
| >3 year                   | 16 (13%)       | 43 (32%)     |                | 16 (13%)       | 10 (13%)    |                |
| <b>Gender</b>             |                |              | 0.776          |                |             | 0.685          |
| Male                      | 64 (52%)       | 71 (53%)     |                | 64 (52%)       | 42 (55%)    |                |
| Female                    | 60 (48%)       | 62 (47%)     |                | 60 (48%)       | 35 (45%)    |                |
| <b>Race</b>               |                |              | 0.478          |                |             | 0.893          |
| White                     | 93 (75%)       | 108 (81%)    |                | 93 (75%)       | 60 (78%)    |                |
| Black                     | 18 (15%)       | 14 (11%)     |                | 18 (15%)       | 10 (13%)    |                |
| Others                    | 13 (10%)       | 11 (8.3%)    |                | 13 (10%)       | 7 (9.1%)    |                |
| <b>Household income</b>   |                |              | 0.568          |                |             | 0.213          |
| <75000\$                  | 88 (71%)       | 90 (68%)     |                | 88 (71%)       | 48 (62%)    |                |
| ≥75000\$                  | 36 (29%)       | 43 (32%)     |                | 36 (29%)       | 29 (38%)    |                |
| <b>Grade</b>              |                |              | 0.529          |                |             | 0.982          |
| Unknown                   | 100 (81%)      | 103 (77%)    |                | 100 (81%)      | 62 (81%)    |                |
| III-IV                    | 24 (19%)       | 30 (23%)     |                | 24 (19%)       | 15 (19%)    |                |
| <b>Primary site</b>       |                |              | 0.678          |                |             | 0.911          |
| Intracranial              | 118 (95%)      | 125 (94%)    |                | 118 (95%)      | 73 (95%)    |                |
| Spinal cord               | 6 (4.8%)       | 8 (6.0%)     |                | 6 (4.8%)       | 4 (5.2%)    |                |
| <b>Laterality</b>         |                |              | 0.012          |                |             | 0.175          |
| Left                      | 21 (17%)       | 22 (17%)     |                | 21 (17%)       | 13 (17%)    |                |
| Right                     | 14 (11%)       | 34 (26%)     |                | 14 (11%)       | 16 (21%)    |                |
| Others                    | 89 (72%)       | 77 (58%)     |                | 89 (72%)       | 48 (62%)    |                |
| <b>Tumor size</b>         |                |              | 0.045          |                |             | 0.461          |
| <4/NOS                    | 61 (49%)       | 82 (62%)     |                | 61 (49%)       | 42 (55%)    |                |
| ≥4cm                      | 63 (51%)       | 51 (38%)     |                | 63 (51%)       | 35 (45%)    |                |
| <b>SEER-stage</b>         |                |              | 0.009          |                |             | 0.163          |
| Localized                 | 65 (52%)       | 93 (70%)     |                | 65 (52%)       | 50 (65%)    |                |
| Regional                  | 23 (19%)       | 20 (15%)     |                | 23 (19%)       | 13 (17%)    |                |
| Distant                   | 36 (29%)       | 20 (15%)     |                | 36 (29%)       | 14 (18%)    |                |
