# Supplementary material for: Dynamic Survival Risk Prognostic Model and Genomic Landscape for Atypical Teratoid/Rhabdoid Tumors: A Population-Based, Real-World Study
Source: Cancers (Basel). 2024 Mar 5;16(5):1059. doi: 10.3390/cancers16051059 (PMC10930634; doi:10.3390/cancers16051059)
Supplement: Supplementary file 1 [file cancers-16-01059-s001.zip › Supplementary Table S3. ATRT GO KEGG analysis.xlsx]

## Sheet: Sheet 1
ONTOLOGY	ID	Description	GeneRatio	BgRatio	pvalue	p.adjust	qvalue	geneID	Count
BP	GO:0009303	rRNA transcription	3/20	34/18800	6.03266e-06	0.00470495	0.00273434	SMARCB1/SMARCA4/TP53	3
BP	GO:0070897	transcription preinitiation complex assembly	3/20	42/18800	1.15107e-05	0.00470495	0.00273434	SMARCB1/SMARCA4/TP53	3
BP	GO:1902895	positive regulation of miRNA transcription	3/20	45/18800	1.4199e-05	0.00470495	0.00273434	SMARCA4/TP53/GATA2	3
BP	GO:0098781	ncRNA transcription	3/20	57/18800	2.90412e-05	0.00470495	0.00273434	SMARCB1/SMARCA4/TP53	3
BP	GO:0042770	signal transduction in response to DNA damage	4/20	174/18800	3.05886e-05	0.00470495	0.00273434	TP53/MSH2/FANCD2/MDM4	4
BP	GO:1902893	regulation of miRNA transcription	3/20	59/18800	3.22222e-05	0.00470495	0.00273434	SMARCA4/TP53/GATA2	3
BP	GO:0061614	miRNA transcription	3/20	60/18800	3.38951e-05	0.00470495	0.00273434	SMARCA4/TP53/GATA2	3
BP	GO:0030900	forebrain development	5/20	376/18800	3.7715e-05	0.00470495	0.00273434	NF2/KRAS/GATA2/BCL11B/ERBB4	5
BP	GO:1901838	positive regulation of transcription of nucleolar large rRNA by RNA polymerase I	2/20	10/18800	4.81377e-05	0.00533453	0.00310023	SMARCB1/SMARCA4	2
BP	GO:0065004	protein-DNA complex assembly	4/20	203/18800	5.58354e-05	0.00533453	0.00310023	SMARCB1/SMARCA4/TP53/KAT6B	4
BP	GO:1903799	negative regulation of production of miRNAs involved in gene silencing by miRNA	2/20	11/18800	5.87974e-05	0.00533453	0.00310023	TP53/NCOR2	2
BP	GO:0051095	regulation of helicase activity	2/20	12/18800	7.05119e-05	0.00586424	0.00340807	TP53/MSH2	2
BP	GO:0006361	transcription initiation from RNA polymerase I promoter	2/20	13/18800	8.3279e-05	0.00588102	0.00341783	SMARCB1/SMARCA4	2
BP	GO:0044773	mitotic DNA damage checkpoint signaling	3/20	81/18800	8.33144e-05	0.00588102	0.00341783	TP53/MSH2/FANCD2	3
BP	GO:0044774	mitotic DNA integrity checkpoint signaling	3/20	85/18800	9.61869e-05	0.00588102	0.00341783	TP53/MSH2/FANCD2	3
BP	GO:2000177	regulation of neural precursor cell proliferation	3/20	85/18800	9.61869e-05	0.00588102	0.00341783	NF2/TP53/GATA2	3
BP	GO:0071824	protein-DNA complex subunit organization	4/20	237/18800	0.000101786	0.00588102	0.00341783	SMARCB1/SMARCA4/TP53/KAT6B	4
BP	GO:0060766	negative regulation of androgen receptor signaling pathway	2/20	15/18800	0.000111963	0.00588102	0.00341783	SMARCA4/NCOR2	2
BP	GO:1901836	regulation of transcription of nucleolar large rRNA by RNA polymerase I	2/20	15/18800	0.000111963	0.00588102	0.00341783	SMARCB1/SMARCA4	2
BP	GO:0031573	mitotic intra-S DNA damage checkpoint signaling	2/20	17/18800	0.000144834	0.00625902	0.00363751	MSH2/FANCD2	2
BP	GO:0043923	positive regulation by host of viral transcription	2/20	17/18800	0.000144834	0.00625902	0.00363751	SMARCB1/SMARCA4	2
BP	GO:0045165	cell fate commitment	4/20	266/18800	0.000158789	0.00625902	0.00363751	TP53/GATA2/BCL11B/ERBB4	4
BP	GO:0008340	determination of adult lifespan	2/20	18/18800	0.000162835	0.00625902	0.00363751	TP53/MSH2	2
BP	GO:0042790	nucleolar large rRNA transcription by RNA polymerase I	2/20	18/18800	0.000162835	0.00625902	0.00363751	SMARCB1/SMARCA4	2
BP	GO:0060965	negative regulation of miRNA-mediated gene silencing	2/20	18/18800	0.000162835	0.00625902	0.00363751	TP53/NCOR2	2
BP	GO:0006337	nucleosome disassembly	2/20	19/18800	0.000181875	0.00625902	0.00363751	SMARCB1/SMARCA4	2
BP	GO:0060149	negative regulation of post-transcriptional gene silencing	2/20	19/18800	0.000181875	0.00625902	0.00363751	TP53/NCOR2	2
BP	GO:0060967	negative regulation of gene silencing by RNA	2/20	19/18800	0.000181875	0.00625902	0.00363751	TP53/NCOR2	2
BP	GO:1900369	negative regulation of post-transcriptional gene silencing by RNA	2/20	19/18800	0.000181875	0.00625902	0.00363751	TP53/NCOR2	2
BP	GO:0032986	protein-DNA complex disassembly	2/20	21/18800	0.000223071	0.00695702	0.00404316	SMARCB1/SMARCA4	2
BP	GO:0140747	regulation of ncRNA transcription	2/20	21/18800	0.000223071	0.00695702	0.00404316	SMARCB1/SMARCA4	2
BP	GO:2000178	negative regulation of neural precursor cell proliferation	2/20	21/18800	0.000223071	0.00695702	0.00404316	TP53/GATA2	2
BP	GO:0000077	DNA damage checkpoint signaling	3/20	115/18800	0.000235604	0.00712524	0.00414092	TP53/MSH2/FANCD2	3
BP	GO:1903798	regulation of production of miRNAs involved in gene silencing by miRNA	2/20	22/18800	0.000245222	0.00717561	0.00417019	TP53/NCOR2	2
BP	GO:0031647	regulation of protein stability	4/20	300/18800	0.00025165	0.00717561	0.00417019	NF2/TP53/KRAS/MDM4	4
BP	GO:0045943	positive regulation of transcription by RNA polymerase I	2/20	23/18800	0.000268405	0.00723967	0.00420742	SMARCB1/SMARCA4	2
BP	GO:0070920	regulation of production of small RNA involved in gene silencing by RNA	2/20	23/18800	0.000268405	0.00723967	0.00420742	TP53/NCOR2	2
BP	GO:0031570	DNA integrity checkpoint signaling	3/20	123/18800	0.000287208	0.00754298	0.00438369	TP53/MSH2/FANCD2	3
BP	GO:0007093	mitotic cell cycle checkpoint signaling	3/20	130/18800	0.00033793	0.00864754	0.00502562	TP53/MSH2/FANCD2	3
BP	GO:0043010	camera-type eye development	4/20	330/18800	0.000361615	0.00899047	0.00522492	SMARCA4/NF2/BCL11B/MAF	4
BP	GO:0006352	DNA-templated transcription, initiation	3/20	134/18800	0.000369348	0.00899047	0.00522492	SMARCB1/SMARCA4/TP53	3
BP	GO:0048873	homeostasis of number of cells within a tissue	2/20	28/18800	0.000399738	0.00927765	0.00539182	KRAS/GATA2	2
BP	GO:0060765	regulation of androgen receptor signaling pathway	2/20	28/18800	0.000399738	0.00927765	0.00539182	SMARCA4/NCOR2	2
BP	GO:0010212	response to ionizing radiation	3/20	142/18800	0.000437708	0.00990869	0.00575856	TP53/MSH2/FANCD2	3
BP	GO:0061351	neural precursor cell proliferation	3/20	143/18800	0.000446784	0.00990869	0.00575856	NF2/TP53/GATA2	3
BP	GO:0010165	response to X-ray	2/20	32/18800	0.000523188	0.0113509	0.00659672	TP53/MSH2	2
BP	GO:0006356	regulation of transcription by RNA polymerase I	2/20	33/18800	0.000556587	0.0118186	0.00686852	SMARCB1/SMARCA4	2
BP	GO:0034728	nucleosome organization	3/20	159/18800	0.00060883	0.0122956	0.00714575	SMARCB1/SMARCA4/KAT6B	3
BP	GO:0001654	eye development	4/20	379/18800	0.000609822	0.0122956	0.00714575	SMARCA4/NF2/BCL11B/MAF	4
BP	GO:0030098	lymphocyte differentiation	4/20	382/18800	0.000628147	0.0122956	0.00714575	TP53/MSH2/FANCD2/BCL11B	4
BP	GO:0150063	visual system development	4/20	383/18800	0.000634342	0.0122956	0.00714575	SMARCA4/NF2/BCL11B/MAF	4
BP	GO:0001701	in utero embryonic development	4/20	387/18800	0.000659558	0.0122956	0.00714575	SMARCB1/TP53/MSH2/GATA2	4
BP	GO:0048880	sensory system development	4/20	389/18800	0.000672431	0.0122956	0.00714575	SMARCA4/NF2/BCL11B/MAF	4
BP	GO:0006739	NADP metabolic process	2/20	37/18800	0.00070027	0.0122956	0.00714575	TP53/IDH2	2
BP	GO:0033144	negative regulation of intracellular steroid hormone receptor signaling pathway	2/20	37/18800	0.00070027	0.0122956	0.00714575	SMARCA4/NCOR2	2
BP	GO:0070306	lens fiber cell differentiation	2/20	37/18800	0.00070027	0.0122956	0.00714575	NF2/MAF	2
BP	GO:0016573	histone acetylation	3/20	167/18800	0.000702255	0.0122956	0.00714575	SMARCB1/KAT6B/GATA2	3
BP	GO:0000075	cell cycle checkpoint signaling	3/20	170/18800	0.000739516	0.0127248	0.00739516	TP53/MSH2/FANCD2	3
BP	GO:0018393	internal peptidyl-lysine acetylation	3/20	173/18800	0.000778018	0.0131604	0.00764832	SMARCB1/KAT6B/GATA2	3
BP	GO:0006475	internal protein amino acid acetylation	3/20	175/18800	0.000804384	0.0133794	0.0077756	SMARCB1/KAT6B/GATA2	3
BP	GO:0031056	regulation of histone modification	3/20	176/18800	0.000817778	0.0133794	0.0077756	SMARCB1/TP53/GATA2	3
BP	GO:0021879	forebrain neuron differentiation	2/20	41/18800	0.000859998	0.0138432	0.00804514	GATA2/BCL11B	2
BP	GO:0060964	regulation of miRNA-mediated gene silencing	2/20	42/18800	0.000902422	0.0142955	0.00830801	TP53/NCOR2	2
BP	GO:0018394	peptidyl-lysine acetylation	3/20	184/18800	0.00093008	0.0143029	0.00831229	SMARCB1/KAT6B/GATA2	3
BP	GO:0048512	circadian behavior	2/20	43/18800	0.00094584	0.0143029	0.00831229	TP53/ZFHX3	2
BP	GO:0048732	gland development	4/20	431/18800	0.000986088	0.0143029	0.00831229	GATA2/NCOR2/BCL11B/ERBB4	4
BP	GO:0007595	lactation	2/20	44/18800	0.000990248	0.0143029	0.00831229	NCOR2/ERBB4	2
BP	GO:0060147	regulation of post-transcriptional gene silencing	2/20	44/18800	0.000990248	0.0143029	0.00831229	TP53/NCOR2	2
BP	GO:1900368	regulation of post-transcriptional gene silencing by RNA	2/20	44/18800	0.000990248	0.0143029	0.00831229	TP53/NCOR2	2
BP	GO:1903131	mononuclear cell differentiation	4/20	433/18800	0.00100321	0.0143029	0.00831229	TP53/MSH2/FANCD2/BCL11B	4
BP	GO:0007622	rhythmic behavior	2/20	45/18800	0.00103565	0.0143787	0.00835637	TP53/ZFHX3	2
BP	GO:0009314	response to radiation	4/20	438/18800	0.00104693	0.0143787	0.00835637	TP53/KRAS/MSH2/FANCD2	4
BP	GO:0045664	regulation of neuron differentiation	3/20	192/18800	0.00105175	0.0143787	0.00835637	GATA2/ZFHX3/BCL11B	3
BP	GO:0030521	androgen receptor signaling pathway	2/20	46/18800	0.00108203	0.0143982	0.0083677	SMARCA4/NCOR2	2
BP	GO:0060966	regulation of gene silencing by RNA	2/20	46/18800	0.00108203	0.0143982	0.0083677	TP53/NCOR2	2
BP	GO:0021872	forebrain generation of neurons	2/20	50/18800	0.0012774	0.0167743	0.0097486	GATA2/BCL11B	2
BP	GO:0043523	regulation of neuron apoptotic process	3/20	207/18800	0.00130617	0.0169293	0.00983866	TP53/KRAS/MSH2	3
BP	GO:0019083	viral transcription	2/20	51/18800	0.00132869	0.0170005	0.00988004	SMARCB1/SMARCA4	2
BP	GO:0035196	production of miRNAs involved in gene silencing by miRNA	2/20	52/18800	0.00138096	0.0174456	0.0101387	TP53/NCOR2	2
BP	GO:0006473	protein acetylation	3/20	216/18800	0.00147592	0.0183388	0.0106578	SMARCB1/KAT6B/GATA2	3
BP	GO:0006360	transcription by RNA polymerase I	2/20	54/18800	0.00148842	0.0183388	0.0106578	SMARCB1/SMARCA4	2
BP	GO:0010332	response to gamma radiation	2/20	56/18800	0.00159975	0.0192355	0.011179	TP53/FANCD2	2
BP	GO:0070918	primary sncRNA processing	2/20	56/18800	0.00159975	0.0192355	0.011179	TP53/NCOR2	2
BP	GO:0016570	histone modification	4/20	494/18800	0.00163278	0.019399	0.011274	SMARCB1/TP53/KAT6B/GATA2	4
BP	GO:0035065	regulation of histone acetylation	2/20	59/18800	0.00177399	0.0208287	0.0121049	SMARCB1/GATA2	2
BP	GO:0045930	negative regulation of mitotic cell cycle	3/20	234/18800	0.00185574	0.0215352	0.0125155	TP53/MSH2/FANCD2	3
BP	GO:0051402	neuron apoptotic process	3/20	241/18800	0.00201848	0.0229058	0.013312	TP53/KRAS/MSH2	3
BP	GO:0048663	neuron fate commitment	2/20	63/18800	0.00201975	0.0229058	0.013312	GATA2/BCL11B	2
BP	GO:0021537	telencephalon development	3/20	247/18800	0.00216486	0.0242756	0.0141081	NF2/BCL11B/ERBB4	3
BP	GO:0051851	modulation by host of symbiont process	2/20	67/18800	0.00228075	0.0252909	0.0146981	SMARCB1/SMARCA4	2
BP	GO:2000756	regulation of peptidyl-lysine acetylation	2/20	68/18800	0.00234836	0.0257107	0.0149421	SMARCB1/GATA2	2
BP	GO:1901988	negative regulation of cell cycle phase transition	3/20	255/18800	0.00237012	0.0257107	0.0149421	TP53/MSH2/FANCD2	3
BP	GO:0043543	protein acylation	3/20	258/18800	0.00245011	0.0259702	0.0150929	SMARCB1/KAT6B/GATA2	3
BP	GO:0002562	somatic diversification of immune receptors via germline recombination within a single locus	2/20	70/18800	0.00248643	0.0259702	0.0150929	MSH2/BCL11B	2
BP	GO:0016444	somatic cell DNA recombination	2/20	70/18800	0.00248643	0.0259702	0.0150929	MSH2/BCL11B	2
BP	GO:0050730	regulation of peptidyl-tyrosine phosphorylation	3/20	261/18800	0.00253177	0.0259702	0.0150929	NF2/TP53/ERBB4	3
BP	GO:0030217	T cell differentiation	3/20	263/18800	0.00258713	0.0259702	0.0150929	TP53/FANCD2/BCL11B	3
BP	GO:0016072	rRNA metabolic process	3/20	264/18800	0.0026151	0.0259702	0.0150929	SMARCB1/SMARCA4/TP53	3
BP	GO:0030330	DNA damage response, signal transduction by p53 class mediator	2/20	72/18800	0.00262825	0.0259702	0.0150929	TP53/MDM4	2
BP	GO:0033143	regulation of intracellular steroid hormone receptor signaling pathway	2/20	72/18800	0.00262825	0.0259702	0.0150929	SMARCA4/NCOR2	2
BP	GO:0043966	histone H3 acetylation	2/20	72/18800	0.00262825	0.0259702	0.0150929	SMARCB1/KAT6B	2
BP	GO:0006338	chromatin remodeling	3/20	266/18800	0.00267159	0.0261397	0.0151914	SMARCB1/SMARCA4/KAT6B	3
BP	GO:0043462	regulation of ATP-dependent activity	2/20	73/18800	0.00270056	0.0261666	0.015207	TP53/MSH2	2
BP	GO:0006302	double-strand break repair	3/20	273/18800	0.00287527	0.0275915	0.0160352	TP53/MSH2/FANCD2	3
BP	GO:0033077	T cell differentiation in thymus	2/20	78/18800	0.00307611	0.0292377	0.0169918	TP53/BCL11B	2
BP	GO:0002200	somatic diversification of immune receptors	2/20	80/18800	0.00323281	0.0302791	0.017597	MSH2/BCL11B	2
BP	GO:0002366	leukocyte activation involved in immune response	3/20	285/18800	0.00324635	0.0302791	0.017597	TP53/MSH2/GATA2	3
BP	GO:0044262	cellular carbohydrate metabolic process	3/20	287/18800	0.00331093	0.0305955	0.0177809	BRAF/TP53/IDH2	3
BP	GO:0002263	cell activation involved in immune response	3/20	289/18800	0.0033763	0.0307856	0.0178914	TP53/MSH2/GATA2	3
BP	GO:1901983	regulation of protein acetylation	2/20	82/18800	0.0033932	0.0307856	0.0178914	SMARCB1/GATA2	2
BP	GO:0042509	regulation of tyrosine phosphorylation of STAT protein	2/20	83/18800	0.00347477	0.0312416	0.0181564	NF2/ERBB4	2
BP	GO:0048511	rhythmic process	3/20	297/18800	0.00364573	0.0324861	0.0188797	TP53/ZFHX3/NCOR2	3
BP	GO:0010948	negative regulation of cell cycle process	3/20	301/18800	0.00378526	0.0330658	0.0192166	TP53/MSH2/FANCD2	3
BP	GO:0002088	lens development in camera-type eye	2/20	87/18800	0.00381019	0.0330658	0.0192166	NF2/MAF	2
BP	GO:0007260	tyrosine phosphorylation of STAT protein	2/20	87/18800	0.00381019	0.0330658	0.0192166	NF2/ERBB4	2
BP	GO:0007589	body fluid secretion	2/20	89/18800	0.00398335	0.0342705	0.0199167	NCOR2/ERBB4	2
BP	GO:0042475	odontogenesis of dentin-containing tooth	2/20	90/18800	0.00407129	0.0347277	0.0201825	NF2/BCL11B	2
BP	GO:0009416	response to light stimulus	3/20	310/18800	0.00411112	0.0347703	0.0202072	TP53/KRAS/MSH2	3
BP	GO:1901214	regulation of neuron death	3/20	313/18800	0.00422343	0.03542	0.0205848	TP53/KRAS/MSH2	3
BP	GO:0015980	energy derivation by oxidation of organic compounds	3/20	321/18800	0.00453208	0.0376918	0.0219051	TP53/MSH2/IDH2	3
BP	GO:0006310	DNA recombination	3/20	324/18800	0.00465128	0.0383635	0.0222954	MSH2/FANCD2/BCL11B	3
BP	GO:0019080	viral gene expression	2/20	100/18800	0.00500002	0.0409018	0.0237706	SMARCB1/SMARCA4	2
BP	GO:0051702	biological process involved in interaction with symbiont	2/20	101/18800	0.00509779	0.0413625	0.0240383	SMARCB1/SMARCA4	2
BP	GO:0031058	positive regulation of histone modification	2/20	103/18800	0.00529597	0.042624	0.0247715	SMARCB1/TP53	2
BP	GO:0046425	regulation of receptor signaling pathway via JAK-STAT	2/20	105/18800	0.00549766	0.0438934	0.0255092	NF2/ERBB4	2
BP	GO:0003279	cardiac septum development	2/20	106/18800	0.00559983	0.0442338	0.025707	TP53/MDM4	2
BP	GO:0007265	Ras protein signal transduction	3/20	347/18800	0.00562895	0.0442338	0.025707	NRAS/TP53/KRAS	3
BP	GO:0008637	apoptotic mitochondrial changes	2/20	107/18800	0.00570286	0.0444645	0.0258411	TP53/ERBB4	2
BP	GO:0070997	neuron death	3/20	353/18800	0.00590286	0.0456671	0.02654	TP53/KRAS/MSH2	3
BP	GO:0001938	positive regulation of endothelial cell proliferation	2/20	111/18800	0.00612371	0.0470112	0.0273212	NRAS/GATA2	2
BP	GO:0050767	regulation of neurogenesis	3/20	361/18800	0.00628042	0.0478463	0.0278064	NF2/TP53/SPEN	3
BP	GO:0030518	intracellular steroid hormone receptor signaling pathway	2/20	115/18800	0.00655839	0.0495854	0.0288172	SMARCA4/NCOR2	2
BP	GO:1904892	regulation of receptor signaling pathway via STAT	2/20	116/18800	0.00666921	0.0500441	0.0290838	NF2/ERBB4	2
BP	GO:0042752	regulation of circadian rhythm	2/20	117/18800	0.00678089	0.0505024	0.0293501	TP53/ZFHX3	2
BP	GO:0018108	peptidyl-tyrosine phosphorylation	3/20	373/18800	0.00687354	0.0508133	0.0295308	NF2/TP53/ERBB4	3
BP	GO:0018212	peptidyl-tyrosine modification	3/20	376/18800	0.00702689	0.051565	0.0299676	NF2/TP53/ERBB4	3
BP	GO:0050678	regulation of epithelial cell proliferation	3/20	382/18800	0.00733972	0.0534675	0.0310733	NRAS/GATA2/BCL11B	3
BP	GO:0045786	negative regulation of cell cycle	3/20	387/18800	0.0076067	0.0550108	0.0319702	TP53/MSH2/FANCD2	3
BP	GO:0018205	peptidyl-lysine modification	3/20	392/18800	0.00787942	0.0565731	0.0328782	SMARCB1/KAT6B/GATA2	3
BP	GO:0042476	odontogenesis	2/20	130/18800	0.00830976	0.0592367	0.0344261	NF2/BCL11B	2
BP	GO:0071333	cellular response to glucose stimulus	2/20	132/18800	0.00855754	0.0605704	0.0352012	SMARCB1/SMARCA4	2
BP	GO:0071331	cellular response to hexose stimulus	2/20	134/18800	0.00880863	0.0619085	0.0359789	SMARCB1/SMARCA4	2
BP	GO:0030879	mammary gland development	2/20	135/18800	0.00893541	0.0619274	0.0359899	NCOR2/ERBB4	2
BP	GO:0043401	steroid hormone mediated signaling pathway	2/20	135/18800	0.00893541	0.0619274	0.0359899	SMARCA4/NCOR2	2
BP	GO:0071326	cellular response to monosaccharide stimulus	2/20	136/18800	0.00906302	0.0623786	0.0362521	SMARCB1/SMARCA4	2
BP	GO:1901987	regulation of cell cycle phase transition	3/20	415/18800	0.00920878	0.0629477	0.0365828	TP53/MSH2/FANCD2	3
BP	GO:0016032	viral process	3/20	418/18800	0.00939133	0.0637288	0.0370368	SMARCB1/SMARCA4/TP53	3
BP	GO:0019827	stem cell population maintenance	2/20	139/18800	0.00945076	0.0637288	0.0370368	GATA2/FANCD2	2
BP	GO:0098727	maintenance of cell number	2/20	141/18800	0.00971334	0.0650598	0.0378103	GATA2/FANCD2	2
BP	GO:0030183	B cell differentiation	2/20	142/18800	0.00984585	0.0655077	0.0380706	TP53/MSH2	2
BP	GO:0071456	cellular response to hypoxia	2/20	143/18800	0.00997917	0.0659551	0.0383306	TP53/MDM4	2
BP	GO:0043524	negative regulation of neuron apoptotic process	2/20	145/18800	0.0102482	0.0664708	0.0386303	KRAS/MSH2	2
BP	GO:0009411	response to UV	2/20	146/18800	0.010384	0.0664708	0.0386303	TP53/MSH2	2
BP	GO:0071322	cellular response to carbohydrate stimulus	2/20	147/18800	0.0105205	0.0664708	0.0386303	SMARCB1/SMARCA4	2
BP	GO:0014010	Schwann cell proliferation	1/20	10/18800	0.01059	0.0664708	0.0386303	NF2	1
BP	GO:0043653	mitochondrial fragmentation involved in apoptotic process	1/20	10/18800	0.01059	0.0664708	0.0386303	ERBB4	1
BP	GO:0048304	positive regulation of isotype switching to IgG isotypes	1/20	10/18800	0.01059	0.0664708	0.0386303	MSH2	1
BP	GO:0051974	negative regulation of telomerase activity	1/20	10/18800	0.01059	0.0664708	0.0386303	TP53	1
BP	GO:0070344	regulation of fat cell proliferation	1/20	10/18800	0.01059	0.0664708	0.0386303	GATA2	1
BP	GO:0051053	negative regulation of DNA metabolic process	2/20	148/18800	0.0106579	0.0664785	0.0386348	TP53/MSH2	2
BP	GO:0051960	regulation of nervous system development	3/20	440/18800	0.0107956	0.0669191	0.0388908	NF2/TP53/SPEN	3
BP	GO:0030902	hindbrain development	2/20	150/18800	0.010935	0.0671669	0.0390349	TP53/GATA2	2
BP	GO:0050673	epithelial cell proliferation	3/20	443/18800	0.010996	0.0671669	0.0390349	NRAS/GATA2/BCL11B	3
BP	GO:0036294	cellular response to decreased oxygen levels	2/20	151/18800	0.0110747	0.0671669	0.0390349	TP53/MDM4	2
BP	GO:0001678	cellular glucose homeostasis	2/20	154/18800	0.0114987	0.0671669	0.0390349	SMARCB1/SMARCA4	2
BP	GO:0051090	regulation of DNA-binding transcription factor activity	3/20	452/18800	0.0116106	0.0671669	0.0390349	SMARCB1/SMARCA4/FANCD2	3
BP	GO:0005984	disaccharide metabolic process	1/20	11/18800	0.0116432	0.0671669	0.0390349	BRAF	1
BP	GO:0021889	olfactory bulb interneuron differentiation	1/20	11/18800	0.0116432	0.0671669	0.0390349	ERBB4	1
BP	GO:0043471	regulation of cellular carbohydrate catabolic process	1/20	11/18800	0.0116432	0.0671669	0.0390349	TP53	1
BP	GO:0045654	positive regulation of megakaryocyte differentiation	1/20	11/18800	0.0116432	0.0671669	0.0390349	GATA2	1
BP	GO:0070243	regulation of thymocyte apoptotic process	1/20	11/18800	0.0116432	0.0671669	0.0390349	TP53	1
BP	GO:1990440	positive regulation of transcription from RNA polymerase II promoter in response to endoplasmic reticulum stress	1/20	11/18800	0.0116432	0.0671669	0.0390349	TP53	1
BP	GO:2000615	regulation of histone H3-K9 acetylation	1/20	11/18800	0.0116432	0.0671669	0.0390349	SMARCB1	1
BP	GO:0022411	cellular component disassembly	3/20	460/18800	0.0121734	0.069822	0.0405779	SMARCB1/SMARCA4/TP53	3
BP	GO:0006983	ER overload response	1/20	12/18800	0.0126952	0.0703879	0.0409068	TP53	1
BP	GO:0051573	negative regulation of histone H3-K9 methylation	1/20	12/18800	0.0126952	0.0703879	0.0409068	SMARCB1	1
BP	GO:0070341	fat cell proliferation	1/20	12/18800	0.0126952	0.0703879	0.0409068	GATA2	1
BP	GO:1900112	regulation of histone H3-K9 trimethylation	1/20	12/18800	0.0126952	0.0703879	0.0409068	SMARCB1	1
BP	GO:1901524	regulation of mitophagy	1/20	12/18800	0.0126952	0.0703879	0.0409068	TP53	1
BP	GO:1903800	positive regulation of production of miRNAs involved in gene silencing by miRNA	1/20	12/18800	0.0126952	0.0703879	0.0409068	TP53	1
BP	GO:0071453	cellular response to oxygen levels	2/20	166/18800	0.0132655	0.0714517	0.041525	TP53/MDM4	2
BP	GO:0003205	cardiac chamber development	2/20	167/18800	0.0134178	0.0714517	0.041525	TP53/MDM4	2
BP	GO:0007346	regulation of mitotic cell cycle	3/20	478/18800	0.013497	0.0714517	0.041525	TP53/MSH2/FANCD2	3
BP	GO:0021953	central nervous system neuron differentiation	2/20	169/18800	0.0137247	0.0714517	0.041525	GATA2/BCL11B	2
BP	GO:0003334	keratinocyte development	1/20	13/18800	0.0137462	0.0714517	0.041525	BCL11B	1
BP	GO:0021514	ventral spinal cord interneuron differentiation	1/20	13/18800	0.0137462	0.0714517	0.041525	GATA2	1
BP	GO:0043970	histone H3-K9 acetylation	1/20	13/18800	0.0137462	0.0714517	0.041525	SMARCB1	1
BP	GO:0060100	positive regulation of phagocytosis, engulfment	1/20	13/18800	0.0137462	0.0714517	0.041525	GATA2	1
BP	GO:0061418	regulation of transcription from RNA polymerase II promoter in response to hypoxia	1/20	13/18800	0.0137462	0.0714517	0.041525	TP53	1
BP	GO:0070234	positive regulation of T cell apoptotic process	1/20	13/18800	0.0137462	0.0714517	0.041525	TP53	1
BP	GO:0097154	GABAergic neuron differentiation	1/20	13/18800	0.0137462	0.0714517	0.041525	GATA2	1
BP	GO:1905155	positive regulation of membrane invagination	1/20	13/18800	0.0137462	0.0714517	0.041525	GATA2	1
BP	GO:0072331	signal transduction by p53 class mediator	2/20	170/18800	0.0138792	0.0717694	0.0417097	TP53/MDM4	2
BP	GO:0007259	receptor signaling pathway via JAK-STAT	2/20	173/18800	0.0143476	0.0734654	0.0426954	NF2/ERBB4	2
BP	GO:0006091	generation of precursor metabolites and energy	3/20	494/18800	0.0147409	0.0734654	0.0426954	TP53/MSH2/IDH2	3
BP	GO:0010225	response to UV-C	1/20	14/18800	0.0147961	0.0734654	0.0426954	TP53	1
BP	GO:0044849	estrous cycle	1/20	14/18800	0.0147961	0.0734654	0.0426954	NCOR2	1
BP	GO:0048302	regulation of isotype switching to IgG isotypes	1/20	14/18800	0.0147961	0.0734654	0.0426954	MSH2	1
BP	GO:0071236	cellular response to antibiotic	1/20	14/18800	0.0147961	0.0734654	0.0426954	TP53	1
BP	GO:0072350	tricarboxylic acid metabolic process	1/20	14/18800	0.0147961	0.0734654	0.0426954	IDH2	1
BP	GO:0090239	regulation of histone H4 acetylation	1/20	14/18800	0.0147961	0.0734654	0.0426954	SMARCB1	1
BP	GO:0001936	regulation of endothelial cell proliferation	2/20	178/18800	0.0151433	0.074241	0.0431461	NRAS/GATA2	2
BP	GO:0060284	regulation of cell development	3/20	500/18800	0.0152237	0.074241	0.0431461	NF2/TP53/SPEN	3
BP	GO:0007219	Notch signaling pathway	2/20	182/18800	0.0157934	0.074241	0.0431461	GATA2/SPEN	2
BP	GO:0006098	pentose-phosphate shunt	1/20	15/18800	0.015845	0.074241	0.0431461	TP53	1
BP	GO:0015074	DNA integration	1/20	15/18800	0.015845	0.074241	0.0431461	SMARCB1	1
BP	GO:0016446	somatic hypermutation of immunoglobulin genes	1/20	15/18800	0.015845	0.074241	0.0431461	MSH2	1
BP	GO:0033008	positive regulation of mast cell activation involved in immune response	1/20	15/18800	0.015845	0.074241	0.0431461	GATA2	1
BP	GO:0043306	positive regulation of mast cell degranulation	1/20	15/18800	0.015845	0.074241	0.0431461	GATA2	1
BP	GO:0045475	locomotor rhythm	1/20	15/18800	0.015845	0.074241	0.0431461	ZFHX3	1
BP	GO:0048291	isotype switching to IgG isotypes	1/20	15/18800	0.015845	0.074241	0.0431461	MSH2	1
BP	GO:0060099	regulation of phagocytosis, engulfment	1/20	15/18800	0.015845	0.074241	0.0431461	GATA2	1
BP	GO:1905153	regulation of membrane invagination	1/20	15/18800	0.015845	0.074241	0.0431461	GATA2	1
BP	GO:0097696	receptor signaling pathway via STAT	2/20	184/18800	0.016123	0.0749109	0.0435354	NF2/ERBB4	2
BP	GO:0030308	negative regulation of cell growth	2/20	186/18800	0.0164555	0.0749109	0.0435354	SMARCA4/TP53	2
BP	GO:0009060	aerobic respiration	2/20	187/18800	0.0166228	0.0749109	0.0435354	MSH2/IDH2	2
BP	GO:0002566	somatic diversification of immune receptors via somatic mutation	1/20	16/18800	0.0168928	0.0749109	0.0435354	MSH2	1
BP	GO:0006089	lactate metabolic process	1/20	16/18800	0.0168928	0.0749109	0.0435354	TP53	1
BP	GO:0010224	response to UV-B	1/20	16/18800	0.0168928	0.0749109	0.0435354	MSH2	1
BP	GO:0023035	CD40 signaling pathway	1/20	16/18800	0.0168928	0.0749109	0.0435354	FANCD2	1
BP	GO:0034349	glial cell apoptotic process	1/20	16/18800	0.0168928	0.0749109	0.0435354	TP53	1
BP	GO:0042532	negative regulation of tyrosine phosphorylation of STAT protein	1/20	16/18800	0.0168928	0.0749109	0.0435354	NF2	1
BP	GO:0070242	thymocyte apoptotic process	1/20	16/18800	0.0168928	0.0749109	0.0435354	TP53	1
BP	GO:0009749	response to glucose	2/20	189/18800	0.0169598	0.0749109	0.0435354	SMARCB1/SMARCA4	2
BP	GO:0007369	gastrulation	2/20	190/18800	0.0171293	0.0749109	0.0435354	NF2/TP53	2
BP	GO:0009755	hormone-mediated signaling pathway	2/20	190/18800	0.0171293	0.0749109	0.0435354	SMARCA4/NCOR2	2
BP	GO:0050731	positive regulation of peptidyl-tyrosine phosphorylation	2/20	190/18800	0.0171293	0.0749109	0.0435354	TP53/ERBB4	2
BP	GO:0050821	protein stabilization	2/20	191/18800	0.0172996	0.0749109	0.0435354	TP53/MDM4	2
BP	GO:0048839	inner ear development	2/20	192/18800	0.0174707	0.0749109	0.0435354	GATA2/MAF	2
BP	GO:0009746	response to hexose	2/20	193/18800	0.0176424	0.0749109	0.0435354	SMARCB1/SMARCA4	2
BP	GO:0001935	endothelial cell proliferation	2/20	194/18800	0.0178149	0.0749109	0.0435354	NRAS/GATA2	2
BP	GO:0006103	2-oxoglutarate metabolic process	1/20	17/18800	0.0179396	0.0749109	0.0435354	IDH2	1
BP	GO:0006978	DNA damage response, signal transduction by p53 class mediator resulting in transcription of p21 class mediator	1/20	17/18800	0.0179396	0.0749109	0.0435354	TP53	1
BP	GO:0010663	positive regulation of striated muscle cell apoptotic process	1/20	17/18800	0.0179396	0.0749109	0.0435354	TP53	1
BP	GO:0010666	positive regulation of cardiac muscle cell apoptotic process	1/20	17/18800	0.0179396	0.0749109	0.0435354	TP53	1
BP	GO:0036124	histone H3-K9 trimethylation	1/20	17/18800	0.0179396	0.0749109	0.0435354	SMARCB1	1
BP	GO:0048569	post-embryonic animal organ development	1/20	17/18800	0.0179396	0.0749109	0.0435354	BCL11B	1
BP	GO:0070230	positive regulation of lymphocyte apoptotic process	1/20	17/18800	0.0179396	0.0749109	0.0435354	TP53	1
BP	GO:0090399	replicative senescence	1/20	17/18800	0.0179396	0.0749109	0.0435354	TP53	1
BP	GO:0034284	response to monosaccharide	2/20	200/18800	0.018865	0.0766309	0.044535	SMARCB1/SMARCA4	2
BP	GO:0006740	NADPH regeneration	1/20	18/18800	0.0189853	0.0766309	0.044535	TP53	1
BP	GO:0006977	DNA damage response, signal transduction by p53 class mediator resulting in cell cycle arrest	1/20	18/18800	0.0189853	0.0766309	0.044535	TP53	1
BP	GO:0010940	positive regulation of necrotic cell death	1/20	18/18800	0.0189853	0.0766309	0.044535	TP53	1
BP	GO:0021756	striatum development	1/20	18/18800	0.0189853	0.0766309	0.044535	BCL11B	1
BP	GO:0033151	V(D)J recombination	1/20	18/18800	0.0189853	0.0766309	0.044535	BCL11B	1
BP	GO:0042772	DNA damage response, signal transduction resulting in transcription	1/20	18/18800	0.0189853	0.0766309	0.044535	TP53	1
BP	GO:0060644	mammary gland epithelial cell differentiation	1/20	18/18800	0.0189853	0.0766309	0.044535	ERBB4	1
BP	GO:0002285	lymphocyte activation involved in immune response	2/20	201/18800	0.0190426	0.0766309	0.044535	TP53/MSH2	2
BP	GO:0071383	cellular response to steroid hormone stimulus	2/20	203/18800	0.0193998	0.0777549	0.0451882	SMARCA4/NCOR2	2
BP	GO:0007623	circadian rhythm	2/20	205/18800	0.0197598	0.0783915	0.0455582	TP53/ZFHX3	2
BP	GO:0031497	chromatin assembly	2/20	205/18800	0.0197598	0.0783915	0.0455582	TP53/KAT6B	2
BP	GO:0060216	definitive hemopoiesis	1/20	19/18800	0.0200299	0.0783915	0.0455582	GATA2	1
BP	GO:0060749	mammary gland alveolus development	1/20	19/18800	0.0200299	0.0783915	0.0455582	ERBB4	1
BP	GO:0061377	mammary gland lobule development	1/20	19/18800	0.0200299	0.0783915	0.0455582	ERBB4	1
BP	GO:2000269	regulation of fibroblast apoptotic process	1/20	19/18800	0.0200299	0.0783915	0.0455582	TP53	1
BP	GO:1901215	negative regulation of neuron death	2/20	209/18800	0.0204885	0.079873	0.0464192	KRAS/MSH2	2
BP	GO:0048863	stem cell differentiation	2/20	211/18800	0.020857	0.0802722	0.0466512	TP53/ERBB4	2
BP	GO:0050679	positive regulation of epithelial cell proliferation	2/20	211/18800	0.020857	0.0802722	0.0466512	NRAS/GATA2	2
BP	GO:0006007	glucose catabolic process	1/20	20/18800	0.0210735	0.0802722	0.0466512	TP53	1
BP	GO:0039692	single stranded viral RNA replication via double stranded DNA intermediate	1/20	20/18800	0.0210735	0.0802722	0.0466512	SMARCB1	1
BP	GO:0070314	G1 to G0 transition	1/20	20/18800	0.0210735	0.0802722	0.0466512	TP53	1
BP	GO:2000010	positive regulation of protein localization to cell surface	1/20	20/18800	0.0210735	0.0802722	0.0466512	ERBB4	1
BP	GO:0033005	positive regulation of mast cell activation	1/20	21/18800	0.022116	0.0832897	0.0484048	GATA2	1
BP	GO:0035020	regulation of Rac protein signal transduction	1/20	21/18800	0.022116	0.0832897	0.0484048	KRAS	1
BP	GO:0035330	regulation of hippo signaling	1/20	21/18800	0.022116	0.0832897	0.0484048	NF2	1
BP	GO:0043583	ear development	2/20	219/18800	0.022359	0.0838882	0.0487526	GATA2/MAF	2
BP	GO:0070374	positive regulation of ERK1 and ERK2 cascade	2/20	220/18800	0.0225498	0.0842874	0.0489846	BRAF/ERBB4	2
BP	GO:0007398	ectoderm development	1/20	22/18800	0.0231575	0.0843473	0.0490194	NF2	1
BP	GO:0021533	cell differentiation in hindbrain	1/20	22/18800	0.0231575	0.0843473	0.0490194	GATA2	1
BP	GO:0031065	positive regulation of histone deacetylation	1/20	22/18800	0.0231575	0.0843473	0.0490194	TP53	1
BP	GO:0032780	negative regulation of ATP-dependent activity	1/20	22/18800	0.0231575	0.0843473	0.0490194	TP53	1
BP	GO:0044346	fibroblast apoptotic process	1/20	22/18800	0.0231575	0.0843473	0.0490194	TP53	1
BP	GO:0061042	vascular wound healing	1/20	22/18800	0.0231575	0.0843473	0.0490194	GATA2	1
BP	GO:1903589	positive regulation of blood vessel endothelial cell proliferation involved in sprouting angiogenesis	1/20	22/18800	0.0231575	0.0843473	0.0490194	GATA2	1
BP	GO:0009743	response to carbohydrate	2/20	226/18800	0.0237093	0.0860432	0.0500051	SMARCB1/SMARCA4	2
BP	GO:0003283	atrial septum development	1/20	23/18800	0.0241979	0.0862481	0.0501242	MDM4	1
BP	GO:0031061	negative regulation of histone methylation	1/20	23/18800	0.0241979	0.0862481	0.0501242	SMARCB1	1
BP	GO:0032042	mitochondrial DNA metabolic process	1/20	23/18800	0.0241979	0.0862481	0.0501242	TP53	1
BP	GO:0048169	regulation of long-term neuronal synaptic plasticity	1/20	23/18800	0.0241979	0.0862481	0.0501242	KRAS	1
BP	GO:0097150	neuronal stem cell population maintenance	1/20	23/18800	0.0241979	0.0862481	0.0501242	FANCD2	1
BP	GO:0045333	cellular respiration	2/20	231/18800	0.0246942	0.0871514	0.0506491	MSH2/IDH2	2
BP	GO:0003181	atrioventricular valve morphogenesis	1/20	24/18800	0.0252372	0.0871514	0.0506491	MDM4	1
BP	GO:0021544	subpallium development	1/20	24/18800	0.0252372	0.0871514	0.0506491	BCL11B	1
BP	GO:0035162	embryonic hemopoiesis	1/20	24/18800	0.0252372	0.0871514	0.0506491	GATA2	1
BP	GO:0036003	positive regulation of transcription from RNA polymerase II promoter in response to stress	1/20	24/18800	0.0252372	0.0871514	0.0506491	TP53	1
BP	GO:0045649	regulation of macrophage differentiation	1/20	24/18800	0.0252372	0.0871514	0.0506491	GATA2	1
BP	GO:0051156	glucose 6-phosphate metabolic process	1/20	24/18800	0.0252372	0.0871514	0.0506491	TP53	1
BP	GO:1901522	positive regulation of transcription from RNA polymerase II promoter involved in cellular response to chemical stimulus	1/20	24/18800	0.0252372	0.0871514	0.0506491	TP53	1
BP	GO:2000637	positive regulation of miRNA-mediated gene silencing	1/20	24/18800	0.0252372	0.0871514	0.0506491	TP53	1
BP	GO:0002703	regulation of leukocyte mediated immunity	2/20	236/18800	0.0256958	0.0884289	0.0513915	MSH2/GATA2	2
BP	GO:0043302	positive regulation of leukocyte degranulation	1/20	25/18800	0.0262755	0.0886894	0.0515429	GATA2	1
BP	GO:0051570	regulation of histone H3-K9 methylation	1/20	25/18800	0.0262755	0.0886894	0.0515429	SMARCB1	1
BP	GO:0060148	positive regulation of post-transcriptional gene silencing	1/20	25/18800	0.0262755	0.0886894	0.0515429	TP53	1
BP	GO:0060333	interferon-gamma-mediated signaling pathway	1/20	25/18800	0.0262755	0.0886894	0.0515429	TP53	1
BP	GO:1900370	positive regulation of post-transcriptional gene silencing by RNA	1/20	25/18800	0.0262755	0.0886894	0.0515429	TP53	1
BP	GO:0032984	protein-containing complex disassembly	2/20	239/18800	0.0263047	0.0886894	0.0515429	SMARCB1/SMARCA4	2
BP	GO:0006312	mitotic recombination	1/20	26/18800	0.0273128	0.0909266	0.0528431	MSH2	1
BP	GO:0018027	peptidyl-lysine dimethylation	1/20	26/18800	0.0273128	0.0909266	0.0528431	SMARCB1	1
BP	GO:0090200	positive regulation of release of cytochrome c from mitochondria	1/20	26/18800	0.0273128	0.0909266	0.0528431	TP53	1
BP	GO:0042593	glucose homeostasis	2/20	244/18800	0.0273326	0.0909266	0.0528431	SMARCB1/SMARCA4	2
BP	GO:0033500	carbohydrate homeostasis	2/20	245/18800	0.0275402	0.0910103	0.0528918	SMARCB1/SMARCA4	2
BP	GO:0045926	negative regulation of growth	2/20	245/18800	0.0275402	0.0910103	0.0528918	SMARCA4/TP53	2
BP	GO:0002699	positive regulation of immune effector process	2/20	248/18800	0.0281667	0.0919484	0.0534369	MSH2/GATA2	2
BP	GO:0003171	atrioventricular valve development	1/20	27/18800	0.028349	0.0919484	0.0534369	MDM4	1
BP	GO:0009651	response to salt stress	1/20	27/18800	0.028349	0.0919484	0.0534369	TP53	1
BP	GO:0046426	negative regulation of receptor signaling pathway via JAK-STAT	1/20	27/18800	0.028349	0.0919484	0.0534369	NF2	1
BP	GO:2000108	positive regulation of leukocyte apoptotic process	1/20	27/18800	0.028349	0.0919484	0.0534369	TP53	1
BP	GO:0034612	response to tumor necrosis factor	2/20	249/18800	0.0283769	0.0919484	0.0534369	TP53/AFF3	2
BP	GO:0001835	blastocyst hatching	1/20	28/18800	0.0293842	0.0929692	0.0540302	SMARCB1	1
BP	GO:0002360	T cell lineage commitment	1/20	28/18800	0.0293842	0.0929692	0.0540302	TP53	1
BP	GO:0035116	embryonic hindlimb morphogenesis	1/20	28/18800	0.0293842	0.0929692	0.0540302	AFF3	1
BP	GO:0035188	hatching	1/20	28/18800	0.0293842	0.0929692	0.0540302	SMARCB1	1
BP	GO:0045830	positive regulation of isotype switching	1/20	28/18800	0.0293842	0.0929692	0.0540302	MSH2	1
BP	GO:0071684	organism emergence from protective structure	1/20	28/18800	0.0293842	0.0929692	0.0540302	SMARCB1	1
BP	GO:0090312	positive regulation of protein deacetylation	1/20	28/18800	0.0293842	0.0929692	0.0540302	TP53	1
BP	GO:0003007	heart morphogenesis	2/20	254/18800	0.0294371	0.0929692	0.0540302	TP53/MDM4	2
BP	GO:0071559	response to transforming growth factor beta	2/20	258/18800	0.0302968	0.0942777	0.0547907	TP53/ZFHX3	2
BP	GO:0019674	NAD metabolic process	1/20	29/18800	0.0304183	0.0942777	0.0547907	TP53	1
BP	GO:0031571	mitotic G1 DNA damage checkpoint signaling	1/20	29/18800	0.0304183	0.0942777	0.0547907	TP53	1
BP	GO:0043153	entrainment of circadian clock by photoperiod	1/20	29/18800	0.0304183	0.0942777	0.0547907	TP53	1
BP	GO:0060441	epithelial tube branching involved in lung morphogenesis	1/20	29/18800	0.0304183	0.0942777	0.0547907	KRAS	1
BP	GO:1900117	regulation of execution phase of apoptosis	1/20	29/18800	0.0304183	0.0942777	0.0547907	TP53	1
BP	GO:0006734	NADH metabolic process	1/20	30/18800	0.0314513	0.0951165	0.0552781	TP53	1
BP	GO:0044819	mitotic G1/S transition checkpoint signaling	1/20	30/18800	0.0314513	0.0951165	0.0552781	TP53	1
BP	GO:0048147	negative regulation of fibroblast proliferation	1/20	30/18800	0.0314513	0.0951165	0.0552781	TP53	1
BP	GO:0051123	RNA polymerase II preinitiation complex assembly	1/20	30/18800	0.0314513	0.0951165	0.0552781	TP53	1
BP	GO:0060045	positive regulation of cardiac muscle cell proliferation	1/20	30/18800	0.0314513	0.0951165	0.0552781	ERBB4	1
BP	GO:0060218	hematopoietic stem cell differentiation	1/20	30/18800	0.0314513	0.0951165	0.0552781	TP53	1
BP	GO:0071480	cellular response to gamma radiation	1/20	30/18800	0.0314513	0.0951165	0.0552781	TP53	1
BP	GO:1903579	negative regulation of ATP metabolic process	1/20	30/18800	0.0314513	0.0951165	0.0552781	TP53	1
BP	GO:0030522	intracellular receptor signaling pathway	2/20	264/18800	0.0316052	0.095293	0.0553807	SMARCA4/NCOR2	2
BP	GO:0051091	positive regulation of DNA-binding transcription factor activity	2/20	265/18800	0.0318254	0.095668	0.0555986	SMARCB1/SMARCA4	2
BP	GO:0000002	mitochondrial genome maintenance	1/20	31/18800	0.0324834	0.0959124	0.0557407	TP53	1
BP	GO:0006099	tricarboxylic acid cycle	1/20	31/18800	0.0324834	0.0959124	0.0557407	IDH2	1
BP	GO:0021772	olfactory bulb development	1/20	31/18800	0.0324834	0.0959124	0.0557407	ERBB4	1
BP	GO:0035066	positive regulation of histone acetylation	1/20	31/18800	0.0324834	0.0959124	0.0557407	SMARCB1	1
BP	GO:0060055	angiogenesis involved in wound healing	1/20	31/18800	0.0324834	0.0959124	0.0557407	GATA2	1
BP	GO:0062098	regulation of programmed necrotic cell death	1/20	31/18800	0.0324834	0.0959124	0.0557407	TP53	1
BP	GO:0051348	negative regulation of transferase activity	2/20	270/18800	0.0329359	0.0969432	0.0563397	NF2/TP53	2
BP	GO:0001894	tissue homeostasis	2/20	272/18800	0.0333844	0.0969432	0.0563397	KRAS/GATA2	2
BP	GO:0008156	negative regulation of DNA replication	1/20	32/18800	0.0335143	0.0969432	0.0563397	TP53	1
BP	GO:0036297	interstrand cross-link repair	1/20	32/18800	0.0335143	0.0969432	0.0563397	FANCD2	1
BP	GO:0043304	regulation of mast cell degranulation	1/20	32/18800	0.0335143	0.0969432	0.0563397	GATA2	1
BP	GO:0071168	protein localization to chromatin	1/20	32/18800	0.0335143	0.0969432	0.0563397	MSH2	1
BP	GO:1902253	regulation of intrinsic apoptotic signaling pathway by p53 class mediator	1/20	32/18800	0.0335143	0.0969432	0.0563397	TP53	1
BP	GO:0046034	ATP metabolic process	2/20	273/18800	0.0336095	0.0969432	0.0563397	TP53/MSH2	2
BP	GO:0003382	epithelial cell morphogenesis	1/20	33/18800	0.0345443	0.0976634	0.0567583	BCL11B	1
BP	GO:0006298	mismatch repair	1/20	33/18800	0.0345443	0.0976634	0.0567583	MSH2	1
BP	GO:0009648	photoperiodism	1/20	33/18800	0.0345443	0.0976634	0.0567583	TP53	1
BP	GO:0010661	positive regulation of muscle cell apoptotic process	1/20	33/18800	0.0345443	0.0976634	0.0567583	TP53	1
BP	GO:0021988	olfactory lobe development	1/20	33/18800	0.0345443	0.0976634	0.0567583	ERBB4	1
BP	GO:0045589	regulation of regulatory T cell differentiation	1/20	33/18800	0.0345443	0.0976634	0.0567583	FANCD2	1
BP	GO:0045648	positive regulation of erythrocyte differentiation	1/20	33/18800	0.0345443	0.0976634	0.0567583	GATA2	1
BP	GO:0000423	mitophagy	1/20	34/18800	0.0355731	0.0980492	0.0569825	TP53	1
BP	GO:0006301	postreplication repair	1/20	34/18800	0.0355731	0.0980492	0.0569825	MSH2	1
BP	GO:0009649	entrainment of circadian clock	1/20	34/18800	0.0355731	0.0980492	0.0569825	TP53	1
BP	GO:0032228	regulation of synaptic transmission, GABAergic	1/20	34/18800	0.0355731	0.0980492	0.0569825	KRAS	1
BP	GO:0033006	regulation of mast cell activation involved in immune response	1/20	34/18800	0.0355731	0.0980492	0.0569825	GATA2	1
BP	GO:0070232	regulation of T cell apoptotic process	1/20	34/18800	0.0355731	0.0980492	0.0569825	TP53	1
BP	GO:1902692	regulation of neuroblast proliferation	1/20	34/18800	0.0355731	0.0980492	0.0569825	TP53	1
BP	GO:1904893	negative regulation of receptor signaling pathway via STAT	1/20	34/18800	0.0355731	0.0980492	0.0569825	NF2	1
BP	GO:2000352	negative regulation of endothelial cell apoptotic process	1/20	34/18800	0.0355731	0.0980492	0.0569825	GATA2	1
BP	GO:0048872	homeostasis of number of cells	2/20	282/18800	0.0356632	0.0980492	0.0569825	KRAS/GATA2	2
BP	GO:1902105	regulation of leukocyte differentiation	2/20	283/18800	0.0358944	0.0984137	0.0571943	GATA2/FANCD2	2
BP	GO:0034599	cellular response to oxidative stress	2/20	284/18800	0.0361261	0.0984576	0.0572199	TP53/FANCD2	2
BP	GO:0001666	response to hypoxia	2/20	286/18800	0.0365915	0.0984576	0.0572199	TP53/MDM4	2
BP	GO:0044403	biological process involved in symbiotic interaction	2/20	286/18800	0.0365915	0.0984576	0.0572199	SMARCB1/SMARCA4	2
BP	GO:0016242	negative regulation of macroautophagy	1/20	35/18800	0.036601	0.0984576	0.0572199	TP53	1
BP	GO:0019320	hexose catabolic process	1/20	35/18800	0.036601	0.0984576	0.0572199	TP53	1
BP	GO:0035137	hindlimb morphogenesis	1/20	35/18800	0.036601	0.0984576	0.0572199	AFF3	1
BP	GO:0090050	positive regulation of cell migration involved in sprouting angiogenesis	1/20	35/18800	0.036601	0.0984576	0.0572199	GATA2	1
BP	GO:0010837	regulation of keratinocyte proliferation	1/20	36/18800	0.0376278	0.0988225	0.0574319	BCL11B	1
BP	GO:0030851	granulocyte differentiation	1/20	36/18800	0.0376278	0.0988225	0.0574319	GATA2	1
BP	GO:0039694	viral RNA genome replication	1/20	36/18800	0.0376278	0.0988225	0.0574319	SMARCB1	1
BP	GO:0043368	positive T cell selection	1/20	36/18800	0.0376278	0.0988225	0.0574319	BCL11B	1
BP	GO:0043516	regulation of DNA damage response, signal transduction by p53 class mediator	1/20	36/18800	0.0376278	0.0988225	0.0574319	TP53	1
BP	GO:0045066	regulatory T cell differentiation	1/20	36/18800	0.0376278	0.0988225	0.0574319	FANCD2	1
BP	GO:0045652	regulation of megakaryocyte differentiation	1/20	36/18800	0.0376278	0.0988225	0.0574319	GATA2	1
BP	GO:0048854	brain morphogenesis	1/20	36/18800	0.0376278	0.0988225	0.0574319	FANCD2	1
BP	GO:1903146	regulation of autophagy of mitochondrion	1/20	36/18800	0.0376278	0.0988225	0.0574319	TP53	1
BP	GO:0042063	gliogenesis	2/20	291/18800	0.0377651	0.0989227	0.0574901	NF2/KRAS	2
BP	GO:0034504	protein localization to nucleus	2/20	294/18800	0.0384763	0.0996802	0.0579304	NF2/TP53	2
BP	GO:0003203	endocardial cushion morphogenesis	1/20	37/18800	0.0386536	0.0996802	0.0579304	MDM4	1
BP	GO:0003230	cardiac atrium development	1/20	37/18800	0.0386536	0.0996802	0.0579304	MDM4	1
BP	GO:0055023	positive regulation of cardiac muscle tissue growth	1/20	37/18800	0.0386536	0.0996802	0.0579304	ERBB4	1
BP	GO:2000279	negative regulation of DNA biosynthetic process	1/20	37/18800	0.0386536	0.0996802	0.0579304	TP53	1
BP	GO:2000758	positive regulation of peptidyl-lysine acetylation	1/20	37/18800	0.0386536	0.0996802	0.0579304	SMARCB1	1
CC	GO:0005667	transcription regulator complex	7/20	483/19594	3.10853e-07	2.82877e-05	2.38866e-05	TP53/GATA2/SPEN/ZFHX3/NCOR2/MAF/MDM4	7
CC	GO:0017053	transcription repressor complex	4/20	76/19594	9.65862e-07	4.39467e-05	3.71094e-05	TP53/SPEN/NCOR2/MDM4	4
CC	GO:0016514	SWI/SNF complex	3/20	26/19594	2.32929e-06	7.06552e-05	5.96626e-05	SMARCB1/SMARCA4/BCL11B	3
CC	GO:0044815	DNA packaging complex	4/20	198/19594	4.31727e-05	0.000982178	0.000829369	SMARCB1/SMARCA4/KAT6B/BCL11B	4
CC	GO:0071564	npBAF complex	2/20	12/19594	6.49297e-05	0.00117285	0.000990375	SMARCB1/SMARCA4	2
CC	GO:0070603	SWI/SNF superfamily-type complex	3/20	86/19594	8.81728e-05	0.00117285	0.000990375	SMARCB1/SMARCA4/BCL11B	3
CC	GO:1904949	ATPase complex	3/20	88/19594	9.44219e-05	0.00117285	0.000990375	SMARCB1/SMARCA4/BCL11B	3
CC	GO:0071565	nBAF complex	2/20	15/19594	0.000103108	0.00117285	0.000990375	SMARCB1/SMARCA4	2
CC	GO:1990391	DNA repair complex	2/20	44/19594	0.000912607	0.00922747	0.00779185	MSH2/FANCD2	2
CC	GO:0016363	nuclear matrix	2/20	109/19594	0.00545717	0.0496603	0.0419341	TP53/NCOR2	2
CC	GO:0034399	nuclear periphery	2/20	127/19594	0.00733709	0.0606978	0.0512543	TP53/NCOR2	2
CC	GO:0070775	H3 histone acetyltransferase complex	1/20	10/19594	0.0101628	0.0770677	0.0650774	KAT6B	1
CC	GO:0005759	mitochondrial matrix	3/20	473/19594	0.0117403	0.0791929	0.0668719	TP53/IDH2/ERBB4	3
CC	GO:0032300	mismatch repair complex	1/20	12/19594	0.0121835	0.0791929	0.0668719	MSH2	1
CC	GO:0001741	XY body	1/20	14/19594	0.0142003	0.0861488	0.0727456	SMARCB1	1
MF	GO:0061629	RNA polymerase II-specific DNA-binding transcription factor binding	7/20	348/18410	5.09387e-08	4.99199e-06	2.25203e-06	SMARCB1/SMARCA4/TP53/KAT6B/GATA2/SPEN/NCOR2	7
MF	GO:0140297	DNA-binding transcription factor binding	7/20	470/18410	3.92904e-07	1.92523e-05	8.68525e-06	SMARCB1/SMARCA4/TP53/KAT6B/GATA2/SPEN/NCOR2	7
MF	GO:0002039	p53 binding	4/20	66/18410	6.98968e-07	2.28329e-05	1.03006e-05	SMARCB1/SMARCA4/TP53/MDM4	4
MF	GO:0001046	core promoter sequence-specific DNA binding	3/20	42/18410	1.2251e-05	0.00030015	0.000135406	SMARCB1/SMARCA4/TP53	3
MF	GO:0030957	Tat protein binding	2/20	10/18410	5.01934e-05	0.000983791	0.000443816	SMARCB1/SMARCA4	2
MF	GO:0003712	transcription coregulator activity	5/20	497/18410	0.000155708	0.00254323	0.00114732	SMARCB1/SMARCA4/KAT6B/SPEN/NCOR2	5
MF	GO:0047485	protein N-terminus binding	3/20	105/18410	0.000191507	0.0026811	0.00120952	SMARCA4/TP53/NCOR2	3
MF	GO:0070182	DNA polymerase binding	2/20	22/18410	0.000255652	0.00313174	0.00141282	SMARCA4/FANCD2	2
MF	GO:0003925	G protein activity	2/20	40/18410	0.00085318	0.00836116	0.00377195	NRAS/KRAS	2
MF	GO:0031492	nucleosomal DNA binding	2/20	40/18410	0.00085318	0.00836116	0.00377195	SMARCB1/SMARCA4	2
MF	GO:0003714	transcription corepressor activity	3/20	191/18410	0.00110029	0.00980259	0.00442222	SMARCA4/SPEN/NCOR2	3
MF	GO:0001228	DNA-binding transcription activator activity, RNA polymerase II-specific	4/20	462/18410	0.0013781	0.0107244	0.00483805	TP53/GATA2/BCL11B/MAF	4
MF	GO:0001216	DNA-binding transcription activator activity	4/20	466/18410	0.00142262	0.0107244	0.00483805	TP53/GATA2/BCL11B/MAF	4
MF	GO:0031491	nucleosome binding	2/20	67/18410	0.00237632	0.0166342	0.00750416	SMARCB1/SMARCA4	2
MF	GO:0019003	GDP binding	2/20	73/18410	0.0028135	0.0183815	0.00829241	NRAS/KRAS	2
MF	GO:0008094	ATP-dependent activity, acting on DNA	2/20	103/18410	0.00551522	0.0329213	0.0148517	SMARCA4/MSH2	2
MF	GO:0031490	chromatin DNA binding	2/20	105/18410	0.00572511	0.0329213	0.0148517	SMARCB1/SMARCA4	2
MF	GO:0001221	transcription coregulator binding	2/20	108/18410	0.00604676	0.0329213	0.0148517	SMARCA4/GATA2	2
MF	GO:0003697	single-stranded DNA binding	2/20	120/18410	0.00741415	0.0382414	0.0172518	TP53/MSH2	2
MF	GO:0042826	histone deacetylase binding	2/20	126/18410	0.0081456	0.0399134	0.0180061	TP53/NCOR2	2
MF	GO:0016922	nuclear receptor binding	2/20	139/18410	0.00983728	0.0459073	0.0207101	SMARCA4/NCOR2	2
MF	GO:0001094	TFIID-class transcription factor complex binding	1/20	10/18410	0.0108133	0.0460742	0.0207854	TP53	1
MF	GO:0032356	oxidized DNA binding	1/20	10/18410	0.0108133	0.0460742	0.0207854	MSH2	1
MF	GO:0032404	mismatch repair complex binding	1/20	11/18410	0.0118885	0.0466031	0.0210239	MSH2	1
MF	GO:0097371	MDM2/MDM4 family protein binding	1/20	11/18410	0.0118885	0.0466031	0.0210239	TP53	1
MF	GO:0035259	nuclear glucocorticoid receptor binding	1/20	13/18410	0.0140356	0.0509441	0.0229823	NCOR2	1
MF	GO:0140666	annealing activity	1/20	13/18410	0.0140356	0.0509441	0.0229823	TP53	1
MF	GO:0030983	mismatched DNA binding	1/20	14/18410	0.0151075	0.052849	0.0238416	MSH2	1
MF	GO:0046965	nuclear retinoid X receptor binding	1/20	15/18410	0.0161783	0.052849	0.0238416	NCOR2	1
MF	GO:0070742	C2H2 zinc finger domain binding	1/20	15/18410	0.0161783	0.052849	0.0238416	GATA2	1
MF	GO:0000400	four-way junction DNA binding	1/20	17/18410	0.0183165	0.0579037	0.026122	MSH2	1
MF	GO:0004708	MAP kinase kinase activity	1/20	18/18410	0.0193839	0.0593633	0.0267804	BRAF	1
MF	GO:0000287	magnesium ion binding	2/20	222/18410	0.0238451	0.0647442	0.0292079	MSH2/IDH2	2
MF	GO:0140097	catalytic activity, acting on DNA	2/20	222/18410	0.0238451	0.0647442	0.0292079	SMARCA4/MSH2	2
MF	GO:0035035	histone acetyltransferase binding	1/20	23/18410	0.0247047	0.0647442	0.0292079	TP53	1
MF	GO:0070577	lysine-acetylated histone binding	1/20	23/18410	0.0247047	0.0647442	0.0292079	SMARCA4	1
MF	GO:0140033	acetylation-dependent protein binding	1/20	23/18410	0.0247047	0.0647442	0.0292079	SMARCA4	1
MF	GO:0001091	RNA polymerase II general transcription initiation factor binding	1/20	24/18410	0.0257655	0.0647442	0.0292079	TP53	1
MF	GO:0042974	nuclear retinoic acid receptor binding	1/20	24/18410	0.0257655	0.0647442	0.0292079	NCOR2	1
MF	GO:0005112	Notch binding	1/20	25/18410	0.0268253	0.065722	0.029649	NCOR2	1
MF	GO:0004709	MAP kinase kinase kinase activity	1/20	26/18410	0.027884	0.0666494	0.0300674	BRAF	1
MF	GO:0050681	nuclear androgen receptor binding	1/20	27/18410	0.0289415	0.0675302	0.0304648	SMARCA4	1
MF	GO:0042393	histone binding	2/20	250/18410	0.0297129	0.0677177	0.0305494	SMARCA4/KAT6B	2
MF	GO:0051721	protein phosphatase 2A binding	1/20	30/18410	0.0321077	0.0715125	0.0322613	TP53	1
MF	GO:0003713	transcription coactivator activity	2/20	266/18410	0.0333006	0.0725214	0.0327164	SMARCB1/SMARCA4	2
MF	GO:0005154	epidermal growth factor receptor binding	1/20	32/18410	0.034213	0.0728885	0.032882	ERBB4	1
MF	GO:0043531	ADP binding	1/20	34/18410	0.0363139	0.0752847	0.033963	MSH2	1
MF	GO:0097718	disordered domain specific binding	1/20	35/18410	0.0373628	0.0752847	0.033963	TP53	1
MF	GO:0000217	DNA secondary structure binding	1/20	36/18410	0.0384106	0.0752847	0.033963	MSH2	1
MF	GO:0004402	histone acetyltransferase activity	1/20	36/18410	0.0384106	0.0752847	0.033963	KAT6B	1
MF	GO:0061733	peptide-lysine-N-acetyltransferase activity	1/20	38/18410	0.0405029	0.077829	0.0351108	KAT6B	1
MF	GO:0001223	transcription coactivator binding	1/20	40/18410	0.0425908	0.0802673	0.0362108	GATA2	1
MF	GO:0001227	DNA-binding transcription repressor activity, RNA polymerase II-specific	2/20	321/18410	0.0468386	0.0853344	0.0384967	TP53/ZFHX3	2
MF	GO:0001217	DNA-binding transcription repressor activity	2/20	325/18410	0.0478917	0.0853344	0.0384967	TP53/ZFHX3	2
MF	GO:0016887	ATP hydrolysis activity	2/20	325/18410	0.0478917	0.0853344	0.0384967	SMARCA4/MSH2	2
MF	GO:0034212	peptide N-acetyltransferase activity	1/20	46/18410	0.0488288	0.0854505	0.0385491	KAT6B	1
MF	GO:0003924	GTPase activity	2/20	336/18410	0.0508331	0.0873973	0.0394274	NRAS/KRAS	2
MF	GO:0051287	NAD binding	1/20	51/18410	0.0539977	0.0912374	0.0411597	IDH2	1
MF	GO:0140296	general transcription initiation factor binding	1/20	52/18410	0.0550282	0.0914028	0.0412344	TP53	1
KEGG	hsa05210	Colorectal cancer	5/16	86/8164	4.59969e-07	2.47954e-05	8.11524e-06	BRAF/NRAS/TP53/KRAS/MSH2	5
KEGG	hsa05225	Hepatocellular carcinoma	6/16	168/8164	4.68903e-07	2.47954e-05	8.11524e-06	SMARCB1/BRAF/SMARCA4/NRAS/TP53/KRAS	6
KEGG	hsa05216	Thyroid cancer	4/16	37/8164	6.25093e-07	2.47954e-05	8.11524e-06	BRAF/NRAS/TP53/KRAS	4
KEGG	hsa05219	Bladder cancer	4/16	41/8164	9.53975e-07	2.83808e-05	9.2887e-06	BRAF/NRAS/TP53/KRAS	4
KEGG	hsa05213	Endometrial cancer	4/16	58/8164	3.9173e-06	9.32317e-05	3.05137e-05	BRAF/NRAS/TP53/KRAS	4
KEGG	hsa05230	Central carbon metabolism in cancer	4/16	70/8164	8.34661e-06	0.000137999	4.51657e-05	NRAS/TP53/KRAS/IDH2	4
KEGG	hsa05218	Melanoma	4/16	72/8164	9.34311e-06	0.000137999	4.51657e-05	BRAF/NRAS/TP53/KRAS	4
KEGG	hsa05223	Non-small cell lung cancer	4/16	72/8164	9.34311e-06	0.000137999	4.51657e-05	BRAF/NRAS/TP53/KRAS	4
KEGG	hsa05214	Glioma	4/16	75/8164	1.09992e-05	0.000137999	4.51657e-05	BRAF/NRAS/TP53/KRAS	4
KEGG	hsa05220	Chronic myeloid leukemia	4/16	76/8164	1.15966e-05	0.000137999	4.51657e-05	BRAF/NRAS/TP53/KRAS	4
KEGG	hsa04012	ErbB signaling pathway	4/16	85/8164	1.8108e-05	0.000195896	6.41146e-05	BRAF/NRAS/KRAS/ERBB4	4
KEGG	hsa05215	Prostate cancer	4/16	97/8164	3.05501e-05	0.000281707	9.21997e-05	BRAF/NRAS/TP53/KRAS	4
KEGG	hsa01522	Endocrine resistance	4/16	98/8164	3.18125e-05	0.000281707	9.21997e-05	BRAF/NRAS/TP53/KRAS	4
KEGG	hsa05205	Proteoglycans in cancer	5/16	205/8164	3.3142e-05	0.000281707	9.21997e-05	BRAF/NRAS/TP53/KRAS/ERBB4	5
KEGG	hsa04722	Neurotrophin signaling pathway	4/16	119/8164	6.82156e-05	0.000541177	0.000177121	BRAF/NRAS/TP53/KRAS	4
KEGG	hsa05224	Breast cancer	4/16	147/8164	0.000155168	0.00114442	0.000374557	BRAF/NRAS/TP53/KRAS	4
KEGG	hsa05226	Gastric cancer	4/16	149/8164	0.000163489	0.00114442	0.000374557	BRAF/NRAS/TP53/KRAS	4
KEGG	hsa04010	MAPK signaling pathway	5/16	294/8164	0.000184341	0.00119026	0.00038956	BRAF/NRAS/TP53/KRAS/ERBB4	5
KEGG	hsa04730	Long-term depression	3/16	60/8164	0.000197453	0.00119026	0.00038956	BRAF/NRAS/KRAS	3
KEGG	hsa05160	Hepatitis C	4/16	157/8164	0.000200044	0.00119026	0.00038956	BRAF/NRAS/TP53/KRAS	4
KEGG	hsa05161	Hepatitis B	4/16	162/8164	0.0002257	0.00127896	0.000418591	BRAF/NRAS/TP53/KRAS	4
KEGG	hsa04720	Long-term potentiation	3/16	67/8164	0.000274111	0.00141822	0.000464169	BRAF/NRAS/KRAS	3
KEGG	hsa05221	Acute myeloid leukemia	3/16	67/8164	0.000274111	0.00141822	0.000464169	BRAF/NRAS/KRAS	3
KEGG	hsa05211	Renal cell carcinoma	3/16	69/8164	0.00029908	0.00148294	0.000485349	BRAF/NRAS/KRAS	3
KEGG	hsa04137	Mitophagy - animal	3/16	72/8164	0.000339222	0.0016147	0.000528472	NRAS/TP53/KRAS	3
KEGG	hsa05212	Pancreatic cancer	3/16	76/8164	0.000397945	0.00182136	0.000596111	BRAF/TP53/KRAS	3
KEGG	hsa01521	EGFR tyrosine kinase inhibitor resistance	3/16	79/8164	0.000446035	0.00196586	0.000643403	BRAF/NRAS/KRAS	3
KEGG	hsa04211	Longevity regulating pathway	3/16	89/8164	0.000632922	0.00268992	0.00088038	NRAS/TP53/KRAS	3
KEGG	hsa04714	Thermogenesis	4/16	232/8164	0.000883479	0.00362531	0.00118652	SMARCB1/SMARCA4/NRAS/KRAS	4
KEGG	hsa04726	Serotonergic synapse	3/16	115/8164	0.00133389	0.00529109	0.00173171	BRAF/NRAS/KRAS	3
KEGG	hsa04071	Sphingolipid signaling pathway	3/16	119/8164	0.00147222	0.00565142	0.00184965	NRAS/TP53/KRAS	3
KEGG	hsa04919	Thyroid hormone signaling pathway	3/16	121/8164	0.00154465	0.00574418	0.00188001	NRAS/TP53/KRAS	3
KEGG	hsa04068	FoxO signaling pathway	3/16	131/8164	0.00194053	0.00679185	0.0022229	BRAF/NRAS/KRAS	3
KEGG	hsa04650	Natural killer cell mediated cytotoxicity	3/16	131/8164	0.00194053	0.00679185	0.0022229	BRAF/NRAS/KRAS	3
KEGG	hsa04210	Apoptosis	3/16	136/8164	0.00216019	0.00729176	0.00238651	NRAS/TP53/KRAS	3
KEGG	hsa04910	Insulin signaling pathway	3/16	137/8164	0.00220591	0.00729176	0.00238651	BRAF/NRAS/KRAS	3
KEGG	hsa04550	Signaling pathways regulating pluripotency of stem cells	3/16	143/8164	0.00249297	0.00801792	0.00262418	NRAS/KRAS/ZFHX3	3
KEGG	hsa05206	MicroRNAs in cancer	4/16	310/8164	0.00258302	0.00808894	0.00264742	NRAS/TP53/KRAS/MDM4	4
KEGG	hsa04150	mTOR signaling pathway	3/16	156/8164	0.00319217	0.0094967	0.00310816	BRAF/NRAS/KRAS	3
KEGG	hsa04218	Cellular senescence	3/16	156/8164	0.00319217	0.0094967	0.00310816	NRAS/TP53/KRAS	3
KEGG	hsa04151	PI3K-Akt signaling pathway	4/16	354/8164	0.00417719	0.012124	0.00396806	NRAS/TP53/KRAS/ERBB4	4
KEGG	hsa05034	Alcoholism	3/16	187/8164	0.00531497	0.0150591	0.00492867	BRAF/NRAS/KRAS	3
KEGG	hsa04062	Chemokine signaling pathway	3/16	192/8164	0.00572085	0.0152328	0.00498553	BRAF/NRAS/KRAS	3
KEGG	hsa04370	VEGF signaling pathway	2/16	59/8164	0.00577333	0.0152328	0.00498553	NRAS/KRAS	2
KEGG	hsa05202	Transcriptional misregulation in cancer	3/16	193/8164	0.00580421	0.0152328	0.00498553	TP53/BCL11B/MAF	3
KEGG	hsa05167	Kaposi sarcoma-associated herpesvirus infection	3/16	194/8164	0.00588832	0.0152328	0.00498553	NRAS/TP53/KRAS	3
KEGG	hsa04213	Longevity regulating pathway - multiple species	2/16	62/8164	0.0063589	0.0161002	0.00526942	NRAS/KRAS	2
KEGG	hsa04929	GnRH secretion	2/16	64/8164	0.0067638	0.016442	0.00538127	NRAS/KRAS	2
KEGG	hsa05203	Viral carcinogenesis	3/16	204/8164	0.00677021	0.016442	0.00538127	NRAS/TP53/KRAS	3
KEGG	hsa04015	Rap1 signaling pathway	3/16	210/8164	0.0073355	0.0174585	0.00571397	BRAF/NRAS/KRAS	3
KEGG	hsa04664	Fc epsilon RI signaling pathway	2/16	68/8164	0.00760804	0.0177521	0.00581006	NRAS/KRAS	2
KEGG	hsa05417	Lipid and atherosclerosis	3/16	215/8164	0.00782762	0.0178904	0.00585534	NRAS/TP53/KRAS	3
KEGG	hsa04917	Prolactin signaling pathway	2/16	70/8164	0.00804722	0.0178904	0.00585534	NRAS/KRAS	2
KEGG	hsa04810	Regulation of actin cytoskeleton	3/16	218/8164	0.00813215	0.0178904	0.00585534	BRAF/NRAS/KRAS	3
KEGG	hsa05166	Human T-cell leukemia virus 1 infection	3/16	222/8164	0.00854911	0.0178904	0.00585534	NRAS/TP53/KRAS	3
KEGG	hsa05208	Chemical carcinogenesis - reactive oxygen species	3/16	223/8164	0.0086553	0.0178904	0.00585534	BRAF/NRAS/KRAS	3
KEGG	hsa01524	Platinum drug resistance	2/16	73/8164	0.00872708	0.0178904	0.00585534	TP53/MSH2	2
KEGG	hsa04115	p53 signaling pathway	2/16	73/8164	0.00872708	0.0178904	0.00585534	TP53/MDM4	2
KEGG	hsa05163	Human cytomegalovirus infection	3/16	225/8164	0.00887005	0.0178904	0.00585534	NRAS/TP53/KRAS	3
KEGG	hsa04662	B cell receptor signaling pathway	2/16	82/8164	0.0109159	0.0216498	0.00708575	NRAS/KRAS	2
KEGG	hsa04540	Gap junction	2/16	88/8164	0.0124967	0.0243787	0.00797888	NRAS/KRAS	2
KEGG	hsa05235	PD-L1 expression and PD-1 checkpoint pathway in cancer	2/16	89/8164	0.0127694	0.024509	0.00802151	NRAS/KRAS	2
KEGG	hsa04912	GnRH signaling pathway	2/16	93/8164	0.0138864	0.0262299	0.00858475	NRAS/KRAS	2
KEGG	hsa05231	Choline metabolism in cancer	2/16	98/8164	0.0153407	0.0285241	0.00933562	NRAS/KRAS	2
KEGG	hsa04933	AGE-RAGE signaling pathway in diabetic complications	2/16	100/8164	0.0159402	0.0291828	0.00955122	NRAS/KRAS	2
KEGG	hsa04916	Melanogenesis	2/16	101/8164	0.0162437	0.029288	0.00958562	NRAS/KRAS	2
KEGG	hsa04914	Progesterone-mediated oocyte maturation	2/16	102/8164	0.0165498	0.0293944	0.00962045	BRAF/KRAS	2
KEGG	hsa04625	C-type lectin receptor signaling pathway	2/16	104/8164	0.0171693	0.0296108	0.00969129	NRAS/KRAS	2
KEGG	hsa04660	T cell receptor signaling pathway	2/16	104/8164	0.0171693	0.0296108	0.00969129	NRAS/KRAS	2
KEGG	hsa04725	Cholinergic synapse	2/16	113/8164	0.0200786	0.0341336	0.0111715	NRAS/KRAS	2
KEGG	hsa04935	Growth hormone synthesis, secretion and action	2/16	120/8164	0.0224754	0.0376701	0.012329	NRAS/KRAS	2
KEGG	hsa05165	Human papillomavirus infection	3/16	331/8164	0.0249753	0.0412787	0.0135101	NRAS/TP53/KRAS	3
KEGG	hsa04926	Relaxin signaling pathway	2/16	129/8164	0.025724	0.0419336	0.0137244	NRAS/KRAS	2
KEGG	hsa04915	Estrogen signaling pathway	2/16	138/8164	0.0291541	0.0468798	0.0153432	NRAS/KRAS	2
KEGG	hsa04371	Apelin signaling pathway	2/16	139/8164	0.0295461	0.0468798	0.0153432	NRAS/KRAS	2
KEGG	hsa04140	Autophagy - animal	2/16	141/8164	0.0303366	0.0475008	0.0155465	NRAS/KRAS	2
KEGG	hsa04072	Phospholipase D signaling pathway	2/16	148/8164	0.0331703	0.0512632	0.0167779	NRAS/KRAS	2
KEGG	hsa04921	Oxytocin signaling pathway	2/16	154/8164	0.0356801	0.054435	0.017816	NRAS/KRAS	2
KEGG	hsa01210	2-Oxocarboxylic acid metabolism	1/16	19/8164	0.0366268	0.0545012	0.0178376	IDH2	1
KEGG	hsa05010	Alzheimer disease	3/16	384/8164	0.0366395	0.0545012	0.0178376	BRAF/NRAS/KRAS	3
KEGG	hsa03430	Mismatch repair	1/16	23/8164	0.0441757	0.0649001	0.0212411	MSH2	1
KEGG	hsa04360	Axon guidance	2/16	182/8164	0.0483263	0.0701321	0.0229535	NRAS/KRAS	2
KEGG	hsa04392	Hippo signaling pathway - multiple species	1/16	29/8164	0.0553951	0.0794219	0.0259939	NF2	1
KEGG	hsa00020	Citrate cycle (TCA cycle)	1/16	30/8164	0.057253	0.0811084	0.0265459	IDH2	1
KEGG	hsa05169	Epstein-Barr virus infection	2/16	202/8164	0.0582309	0.0815233	0.0266817	TP53/NCOR2	2
KEGG	hsa05022	Pathways of neurodegeneration - multiple diseases	3/16	476/8164	0.0625885	0.0857789	0.0280745	BRAF/NRAS/KRAS	3
KEGG	hsa05170	Human immunodeficiency virus 1 infection	2/16	212/8164	0.0634331	0.0857789	0.0280745	NRAS/KRAS	2
KEGG	hsa05207	Chemical carcinogenesis - receptor activation	2/16	212/8164	0.0634331	0.0857789	0.0280745	NRAS/KRAS	2
KEGG	hsa04960	Aldosterone-regulated sodium reabsorption	1/16	37/8164	0.0701624	0.0938126	0.0307038	KRAS	1
